# Supplementary material for: Glucose-lactose mixture feeds in industry-like conditions: a gene regulatory network analysis on the hyperproducing Trichoderma reesei strain&nbsp;Rut-C30
Source: Research Square preprint supplement (doi:10.21203/rs.3.rs-29020/v4), 2020-12-04
Supplement: Supplementary file 1 [file 81ce1937e594c9b5e70587b0.xlsx]

## Sheet: Differentially expressed genes
Cluster	ID	Function	Contig_Assemblage QM6a	Position_Assemblage QM6a	Contig_Assemblage RutC30	Position_Assemblage RutC30	Ortholog S. cerevisiae	Ortholog A. nidulans	Ortholog N. crassa	Transcription factor	Exp_24h_G90-L10-Glu	Exp_24h_G75-L25-Glu	Exp_24h_Lac-Glu	Exp_48h_G90-L10-Glu	Exp_48h_G75-L25-Glu	Exp_48h_Lac-Glu
1	1992	Putative HD superfamily hydrolase	CHR_III	101	CHR_III	103		AN9449	NCU01340		-1.42825	-1.586	-2.83476	-0.954304	-0.845642	-1.8571
3	2036	Putative Dihydrodipicolinate synthase	CHR_I	403	CHR_I	396					-0.623434	2.46621	4.61239	0.845226	3.38824	6.31287
1	2068	Putative MFS Transporter	CHR_I	302	CHR_I	295					-1.1991	-1.12304	-2.23261	-0.467697	-0.503744	-2.78013
2	2211	Putative Transketolase	CHR_IV	378	CHR_IV	389		AN8551			1.68751	2.05876	2.80284	1.0943	1.41889	2.48381
2	2343	Putative protein of unknown function	CHR_V	637	CHR_V	946					1.24626	2.22634	3.22368	1.77728	2.44976	3.14004
2	3292	Putative D-arabinitol 2-dehydrogenase	CHR_V	103	CHR_V	103		AN5017			1.61568	1.04191	1.97523	1.53341	0.838375	2.48122
2	3333	Putative Alcohol dehydrogenase	CHR_V	187	CHR_V	187					0.402311	0.542008	1.22751	0.375827	0.727936	2.02072
2	3405	MFS Lactose transporter CRT1	CHR_V	344	CHR_V	344		AN6831			2.06626	2.82137	3.101	1.33667	2.07246	2.5349
2	3719	Putative protein of unknown function	CHR_VI	717	CHR_VI	717			NCU06936		1.12423	1.46614	1.87762	1.56097	2.29878	2.49905
2	3739	Putative Glycoside hydrolase family 43	CHR_VI	762	CHR_VI	762		AN7864	NCU09652		1.01039	1.53941	2.06503	0.920037	1.3299	2.1475
2	3823	Putative protein of unknown function	CHR_VI	914	CHR_VI	914		AN5019	NCU10020		0.834736	1.28422	2.22707	1.09916	1.32782	2.73359
2	4179	Putative protein of unknown function	CHR_VI	228	CHR_VI	228		AN7154			2.12761	2.87841	3.44144	0.874088	1.72302	2.12128
1	4426	Putative protein of unknown function	CHR_VII	543	CHR_VII	543			NCU04618		-0.715281	-0.576531	-1.47907	-0.675284	-0.729554	-2.13847
1	4430	Putative Developmental Transcriptional regulator WetA	CHR_VII	531	CHR_VII	531		AN1937	NCU01033	TF	-0.726506	-0.543409	-1.73802	-0.344577	-0.464675	-2.28318
1	4561	Putative Glycosyltransferase family 32	CHR_IV	286	CHR_IV	292			NCU08232		-1.09327	-1.47941	-1.79584	-1.01569	-1.64041	-2.63699
2	4876	Putative Catechol dioxygenase	CHR_II	702	CHR_II	702		AN8566	NCU04072		0.146035	1.19849	1.4563	0.674656	1.40637	2.55159
5	4999	Putative Cytochrome P450	CHR_III	902	CHR_III	904					-1.26294	-1.96217	-3.05388	-2.0562	-2.75856	-4.30917
4	5345	Putative FAD oxidoreductase	CHR_I	916	CHR_VII	2		AN10388	NCU08199		1.99333	2.37066	2.11504	1.2625	1.7105	1.01589
1	5359	Putative DUF1348 family protein	CHR_I	954	CHR_VII	5		AN11109	NCU03152		-0.140581	-2.40357	-1.36994	-0.219574	-2.15105	0.146577
3	5369	Putative Carboxipeptidase A1	CHR_I	978	CHR_VII	9					2.42582	3.63451	4.68563	1.52898	2.48785	4.43413
1	5647	Putative GPCR PTH11 type receptor	CHR_VI	1634	CHR_VI	1634		AN7232			-1.51782	-2.48654	-2.90151	-0.427448	-1.58053	-3.10025
1	5787	Putative Amino acid transporter	CHR_II	1000	CHR_II	1000					-1.79453	-2.2463	-2.20871	-1.44935	-2.1007	-1.84071
2	5807	Putative Glycoside hydrolase family 95	CHR_III	1050	CHR_III	1048		AN8149			0.578302	1.27986	2.13744	-0.0221656	0.801301	2.21004
4	6107	Putative protein of unknown function	CHR_III	971	CHR_III	973		AN4906	NCU00023		2.53145	6.23653	3.06618	1.86384	4.37794	2.61785
2	6108	Putative S-adenosyl-L-methionine-dependent methyltransferase binding domain protein	CHR_VI	1499	CHR_VI	1499					1.40102	1.75696	2.4733	1.20509	1.40424	2.19268
2	21664	Putative protein of unknown function	CHR_II	465	CHR_II	465	YMR123W	AN10261	NCU00506		0.791793	1.08582	1.88804	1.10499	1.17554	2.06782
2	22004	D-galacturonic acid reductase GAR1	CHR_V	201	CHR_V	201	YDR368W	AN5986	NCU01906		1.13669	1.81701	2.59763	0.670563	1.35544	2.43933
4	22197	Glycoside hydrolase family 1 CEL1B	CHR_VI	706	CHR_VI	706		AN10124	NCU00130		1.51207	2.12682	2.02075	0.990122	1.32626	1.26573
5	22210	Putative Carboxypeptidase A1	CHR_VI	752	CHR_VI	752			NCU07536		-1.79063	-2.00246	-3.90153	-1.37084	-1.68989	-4.60168
2	22284	Putative Gluconolactonase	CHR_I	739	CHR_I	738	YBR053C	AN1688	NCU00326		1.3635	1.77181	2.24697	1.07718	1.40239	2.3752
1	22386	Putative protein of unknown function	CHR_VI	516	CHR_VI	516			NCU02884		-1.01475	-1.32062	-1.88782	-1.0648	-0.79639	-2.6221
5	22459	Putative Carboxypeptidase	CHR_VI	220	CHR_VI	220					-1.4796	-1.45612	-2.96501	-2.23296	-1.95628	-4.19109
1	22912	Putative High Affinity Glucose Transporter	CHR_III	911	CHR_III	913					-1.2877	-1.31566	-2.4539	-1.71696	-1.89914	-2.24341
1	23115	Expansin like protein EEL2	CHR_VI	1452	CHR_VI	1452					-0.57267	-0.32875	-1.63505	-0.113803	0.0680869	-1.95547
1	23146	Putative protein of unknown function	CHR_VI	1382	CHR_VI	1382		AN3130	NCU03132		-1.0286	-1.31182	-2.20145	-1.40633	-1.41092	-2.74287
5	23171	Putative 70 kb peptaibol synthase	CHR_II	817	CHR_II	817					-1.67261	-2.13403	-3.39755	-3.42842	-3.03044	-4.22677
3	23228	Putative DUF1479 family protein	CHR_VI	1025	CHR_VI	1025		AN4729			3.82317	4.94705	6.03449	2.92398	3.34969	5.44978
2	23353	Putative Ferric reductase transmembrane precursor	CHR_II	1012	CHR_II	1012		AN3208	NCU00829		0.578989	1.01687	1.94596	0.144928	0.895562	2.64842
5	23415	Putative Amino acid transporter DIP5	CHR_VI	1543	CHR_VI	1543	YPL265W	AN8279	NCU10276		-2.60862	-2.94476	-5.47598	-3.47225	-3.35383	-7.48309
2	26163	Putative Zn(2)Cys6 cellulose degradation transcription factor CLR2	CHR_V	345	CHR_V	345		AN6832	NCU08042	TF	1.51021	2.12184	2.49707	1.06057	1.61442	2.19375
1	26462	Putative protein of unknown function	CHR_III	242	CHR_III	244	YDR006C	AN10558	NCU03466		-0.802206	-1.06241	-1.63118	-0.678899	-0.863887	-2.16325
2	27259	Putative Glycoside hydrolase family 27	CHR_III	1041	CHR_III	1039					0.481322	0.925302	1.89418	0.648616	1.3209	2.68109
1	27649	Putative Transcription factor res-2	CHR_III	839	CHR_III	841		AN1500	NCU03699	TF	-0.691285	-0.77125	-1.48571	-1.12745	-1.07446	-2.04309
1	27992	Putative GPCR PTH11 type recepto	CHR_V	247	CHR_V	247					-1.34814	-1.79907	-2.26399	-2.0113	-2.20096	-2.86066
2	28036	Putative protein of unknown function	CHR_IV	1152	CHR_IV	1162		AN10036	NCU11990		1.23204	0.458111	1.90746	1.48635	0.32879	2.21013
4	28185	Putative protein of unknown function	CHR_VII	756	CHR_VII	756					1.23112	1.11929	0.113869	1.14519	0.226077	-1.43396
2	28781	Putative NDT80/PhoG like DNA-binding domain protein	CHR_V	560	CHR_V	869		AN6015	NCU09915		0.386191	1.483	2.27022	0.232705	0.737712	1.87121
1	29346	Putative Lipid phosphate phosphatase	CHR_VII	103	CHR_VII	103			NCU09692		0.409874	-0.482508	-1.55407	0.557785	-1.18128	-3.84892
1	30084	Putative protein of unknown function	CHR_VI	376	CHR_VI	376					-0.496242	-0.952242	-0.966742	-1.53282	-1.50876	-2.43548
2	30758	Putative RTA1 domain protein	CHR_I	908	CHR_VII	161		AN7877			-1.25565	-0.695501	1.82073	0.340341	1.03508	2.62268
1	31069	Putative protein of unknown function	CHR_II	719	CHR_II	719		AN7836			-0.660047	-0.249239	-1.46079	-0.0143447	-0.529403	-2.33668
1	32712	Putative NACHT domain /ankyrin repeats protein	CHR_V	128	CHR_V	128					-0.763956	-1.29091	-2.03362	-1.51873	-1.95187	-2.68937
2	33029	Putative Sterol binding protein	CHR_VII	1672	CHR_I	1162	YKR013W	AN10057	NCU05618		1.12822	2.31521	2.97833	0.933962	1.91761	3.27188
5	33827	Putative protein of unknown function	CHR_V	411	CHR_IV & contig 11	116 & 411		AN0493	NCU09765		-1.69647	-2.82451	-3.16463	-2.07123	-3.15874	-3.22563
1	35109	Putative NWD2 protein	CHR_II	163	CHR_II	163		AN8505			-1.81006	-1.06962	-1.93227	-1.42398	-1.09548	-2.03441
2	35202	Putative protein of unknown function	CHR_V	110	CHR_V	110		AN4669	NCU09211		1.76137	2.60339	3.19025	0.810807	1.53944	2.79424
1	35726	Putative Subtilisin	CHR_V	136	CHR_V	136					0.838468	0.68064	-1.18681	0.048998	0.0329667	-3.34077
1	37525	Putative GPCR receptor	CHR_V	1276	CHR_V	1585					-1.21179	-2.10105	-2.64704	-1.60294	-1.92505	-3.58227
1	41035	Putative protein of unknown function	CHR_VI	1380	CHR_VI	1380			NCU04034		-1.46873	-1.78252	-2.53885	-2.54826	-2.24992	-3.61238
1	41604	Putative protein of unknown function	CHR_VI	1680	CHR_VI	1680	YHL026C				-1.59594	-1.98903	-1.80228	-0.971888	-0.78396	-2.98847
2	41607	Putative protein of unknown function	CHR_VII	1666	CHR_I	1156					1.34161	2.6584	2.45728	0.38773	1.50614	1.48541
1	41761	Putative Vacuolar iron transporter	CHR_VII	1318	CHR_V	564			NCU11307		-1.43764	-2.02935	-2.17728	-1.16321	-1.24639	-1.89914
1	42752	Putative Tryspsin	CHR_V	482	CHR_V	482					-0.849921	-1.33337	-2.2177	-1.55687	-1.78541	-2.78151
2	43101	Putative protein of unknown function	CHR_IV	91	CHR_IV	92			NCU04752		1.04992	1.43702	2.04755	1.19805	1.39241	1.82237
1	43115	Putative protein of unknown function	CHR_I	772	CHR_I	771			NCU11837		-0.928741	-1.06173	-1.41195	-0.92886	-2.06175	-1.17874
2	43161	Putative protein of unknown function	CHR_V	1289	CHR_V	1598					0.210749	0.0683772	0.677756	0.229103	0.521272	2.07489
1	43397	Putative Cupin domain protein	CHR_VII	1663	CHR_I	1153					-0.479041	-0.768984	-2.05442	-0.923059	-0.840292	-2.41851
1	43873	Putative Glycoside hydrolase family 18 CHI18-12	CHR_III	407	CHR_III	409	YLR286C	AN11059	NCU04500		-1.55352	-0.537828	-2.25977	0.394967	0.643824	-0.585833
1	44230	Putative GTP-binding protein	CHR_III	104	CHR_III	106		AN9121	NCU03600		-1.50267	-1.14376	-2.44752	-1.77903	-1.22524	-3.2476
5	44362	Putative Acetyl-CoA synthetase	CHR_I	344	CHR_I	337					-1.73667	-3.06651	-4.20258	-2.95702	-3.24353	-6.30029
1	44747	Putative protein of unknown function	CHR_V	481	CHR_V	481					-0.98272	-1.24496	-2.05312	-1.81936	-1.83901	-2.55555
2	44967	Putative protein of unknown function	CHR_V	682	CHR_V	991		AN4127	NCU08154		2.06844	2.26135	2.61085	1.44816	1.61509	2.23494
1	45573	Putative GPCR PTH11 type receptor	CHR_II	410	CHR_II	410					0.282217	0.189387	-1.07589	-0.140777	0.293841	-2.30868
1	46127	Putative protein of unknown function	CHR_VII	1165	CHR_V	794		AN11018	NCU00128		-1.53965	-2.03696	-2.57749	-1.72492	-1.56498	-2.78847
1	46764	Putative protein of unknown function	CHR_IV	371	CHR_IV	377					-0.402106	-2.3615	-0.76225	-0.556102	-2.08454	-1.14167
5	46794	Putative MFS peptide transporter	CHR_IV	353	CHR_IV	359					-1.84246	-1.92562	-4.60404	-2.05979	-1.99897	-5.07026
2	46816	Glycoside hydrolase family 3 CEL3D	CHR_V	5	CHR_V	5		AN3903			1.57133	2.30269	3.27685	0.844763	1.52916	2.95078
2	46819	Putative MFS sugar transporter	CHR_V	6	CHR_V	6		AN0233	NCU05853		1.29105	2.44262	3.23329	0.794898	1.76182	2.36458
3	49081	Glycoside hydrolase family 74 CEL74A	CHR_VII	700	CHR_VII	700		AN5061	NCU05955		2.79682	4.11135	5.04988	2.04217	3.04657	4.23519
1	49193	Putative Glycoside hydrolase family 17	CHR_VII	598	CHR_VII	598	YGR279C	AN1551	NCU09326		0.41908	0.75881	-0.694391	0.0780779	0.671593	-1.40053
2	49753	L-arabinitol 4-dehydrogenase LAD1	CHR_VI	1261	CHR_VI	1261		AN4336	NCU00643		0.993156	1.71822	2.74302	1.26168	2.00844	2.67784
5	49898	Putative Diphosphoinositol polyphosphate phosphohydrolase	CHR_VI	1155	CHR_VI	1155		AN1418	NCU04727		-1.71506	-2.71907	-3.06895	-2.55922	-2.93261	-3.03538
1	49928	Putative protein of unknown function	CHR_VI	1128	CHR_VI	1128		AN7532	NCU03960		-1.98458	-2.28765	-2.48274	-1.73518	-1.99977	-2.75265
3	49976	Putative Glycoside hydrolase family 45	CHR_I	75	CHR_I	68		AN6786			3.0084	4.46768	5.43055	1.95763	2.88604	4.14065
1	50104	Putative Phosphatidyl synthase	CHR_II	589	CHR_II	589		AN3085	NCU05818		-0.415482	-2.27378	-1.01818	-1.11353	-2.0643	-1.20683
1	50215	Putative Glycoside Hydrolase family 16	CHR_II	689	CHR_II	689			NCU09904		-0.191763	-0.300431	-1.59155	-0.426246	-0.312058	-2.32046
2	50793	Putative tyrosinase	CHR_IV	1021	CHR_IV	1031		AN8435	NCU08615		-0.134762	0.357458	2.61517	-0.674889	-0.873886	4.94012
3	50894	Putative MFS pentose transporter	CHR_IV	1126	CHR_IV	1136					2.19057	3.05548	3.57566	1.6167	2.31204	2.85268
1	51650	Putative Phosphate metabolism protein	CHR_II	859	CHR_II	859	YOL084W	AN0229	NCU06986		-0.988153	-1.39404	-1.82301	-1.64756	-1.56162	-2.56681
2	51686	Putative Dienelactone hydrolase	CHR_VI	94	CHR_VI	94	YAL049C	AN3712	NCU07127		1.07593	0.940328	1.83072	1.39875	0.966814	2.0765
1	51893	Putative protein of unknown function	CHR_VI	1064	CHR_VI	1064		AN1967	NCU05858		-1.17996	-1.59625	-2.60417	-1.57422	-1.77997	-3.62241
2	52165	Putative FK506 suppressor	CHR_III	748	CHR_III	750	YKL051W	AN5768	NCU03660		1.35274	1.37305	2.03462	1.09438	0.701626	2.36892
5	52206	Mating type pheromone hybrid HPP1	CHR_III	775	CHR_III	777					-2.85107	-3.52803	-6.94042	-2.5054	-1.64759	-5.19091
1	52520	Putative Cyclin	CHR_VI	1018	CHR_VI	1018	YDL127W	AN0453	NCU04847		-1.37697	-1.42119	-2.07411	-1.12985	-0.943433	-2.47622
5	53053	Putative Clavaminate synthase	CHR_I	345	CHR_I	338					-1.38399	-2.31322	-3.44101	-1.91725	-2.43899	-5.50978
2	53526	Putative L-iditol 2-dehydrogenase	CHR_IV	379	CHR_IV	390		AN8552			1.15719	1.57329	2.35244	0.978539	1.14211	2.0811
1	53611	Putative MFS transporter	CHR_III	52	CHR_III	54		AN10115			-0.572066	-1.67914	-2.11856	-0.289077	-1.0679	-1.87268
2	53673	Putative NADP:D-xylose dehydrogenase	CHR_III	193	CHR_III	195		AN5123	NCU01704		0.930187	1.3352	2.16752	1.05205	1.20868	2.46524
5	53868	Putative FMN binding oxidoreductase	CHR_III	32	CHR_III	34		AN6167	NCU08900		-1.27697	-2.92405	-3.57332	-2.93623	-3.96016	-2.36908
1	53961	Putative pepsin	CHR_I	308	CHR_I	301					-0.360224	-0.852448	-1.20423	-0.280409	-0.378483	-2.00337
1	54198	Putative Glycoside hydrolase	CHR_III	410	CHR_III	412		AN7871	NCU01720		0.0308461	0.0288376	-1.69644	-0.253497	-0.113365	-2.29715
2	54223	Putative NAD(P)-binding Rossmann-fold domain protein	CHR_I	262	CHR_I	255					0.439905	0.988486	1.85519	0.548683	0.920866	2.7003
2	54227	Putative NAD(P)-binding Rossmann-fold domain protein	CHR_I	318	CHR_I	311					1.24405	1.37871	1.94546	0.499241	-0.607861	3.69613
1	54239	Putative multicopper oxidase (laccase)	CHR_I	314	CHR_I	307		AN0878			-1.18743	-2.27799	-2.22009	-1.00479	-1.50834	-2.99535
1	54260	Putative Indoleamine 2,3-dioxygenase	CHR_IV	398	CHR_IV	409		AN1858	NCU11798		-0.323041	-2.15967	-2.69083	-1.4802	-3.60534	-1.95402
1	54352	Putative protein of unknown function	CHR_III	560	CHR_III	562		AN4198	NCU03247		-0.786331	-0.706332	-3.19562	-1.74235	-1.40213	-3.34369
3	54461	Putative MFS transporter	CHR_III	7	CHR_III	9		AN0993	NCU09678		1.18624	2.64324	4.13637	1.99211	1.65239	4.95606
3	54632	Putative MFS sugar transporter	CHR_III	146	CHR_III	148					2.9316	3.69141	4.3299	2.74881	3.03433	3.71427
1	54667	Putative Acyl-CoA synthetase	CHR_I	388	CHR_I	381					-1.62934	-1.96642	-2.59552	-2.36696	-2.68294	-3.39225
5	54768	Putative protein of unknown function	CHR_I	346	CHR_I	339		AN3539			-1.79267	-2.91168	-3.97202	-3.00468	-3.42324	-6.32096
2	54886	Putative Glutathione S-transferase	CHR_IV	453	CHR_IV	464					2.49697	2.82876	2.61785	1.66867	1.55224	3.15913
1	55272	Putative protein of unknown function	CHR_V	381	CHR_V	381					-0.992512	-1.39011	-2.03536	-1.72379	-1.95645	-2.7971
1	55319	Glycoside hydrolase family 54 ABF2	CHR_V	787	CHR_V	1096					-1.11158	-1.00049	-2.0186	-1.74495	-2.0801	-2.57814
2	55375	Putative protein of unknown function	CHR_V	518	CHR_V	827		AN10664	NCU07994		0.981573	1.51147	2.316	0.73011	1.20856	2.66397
3	55478	Putative protein of unknown function	CHR_V	576	CHR_V	885		AN5089	NCU06335		2.73346	3.18201	4.62976	1.13859	2.17487	3.90618
1	55566	Putative multicopper oxidase	CHR_V	382	CHR_V	382		AN7389			-1.5188	-1.89819	-2.57018	-1.95402	-2.45007	-3.30218
4	55837	Putative Phosphoribosyltransferase domain protein	CHR_V	681	CHR_V	990					2.11002	2.32093	2.27248	1.47754	1.81237	1.79377
1	55990	Putative protein of unknown function	CHR_V	538	CHR_V	847					-1.09143	-1.74996	-2.18543	-1.5307	-1.77087	-3.20125
2	55999	Putative Glycoside hydrolase family 31	CHR_V	821	CHR_V	1130		AN0022			1.88344	2.66135	3.23541	1.82902	2.24625	2.67801
1	56095	Putative MFS transporter	CHR_V	670	CHR_V	979		AN0201			-0.531209	0.593398	-0.859984	-0.198275	0.844536	-2.04241
4	56272	Putative Cytochrome P450	CHR_II	342	CHR_II	342					3.08828	3.56169	1.88627	1.66532	2.27072	-0.189957
2	56289	Putative MFS transporter	CHR_II	7	CHR_II	7		AN3195	NCU02653		1.29427	2.26474	2.63865	0.834467	1.77313	2.0932
1	56314	Putative Amino acid transporter	CHR_II	20	CHR_II	20	YDL210W	AN2287			-1.02123	-1.12117	-1.62497	-1.44185	-2.24131	-2.82237
2	56350	Putative Tryptophan synthase protein	CHR_II	23	CHR_II	23		AN6648			0.789265	1.06457	3.44401	1.00333	1.4625	3.85361
1	56499	Putative Zn-dependent hydrolase/oxidoreductase	CHR_II	542	CHR_II	542	YPL103C	AN3132	NCU07271		-1.5044	-1.53711	-2.82069	-1.79786	-2.55001	-2.42201
2	56646	Putative FAD/NAD(P)-binding domain protein	CHR_II	31	CHR_II	31		AN8359			0.19272	0.800914	2.41135	0.690189	1.4751	3.5806
3	56684	Putative MFS sugar transporter	CHR_II	25	CHR_II	25					2.35202	3.71634	5.26631	1.41395	2.56344	4.33634
4	56687	Putative Cytochrome P450	CHR_II	339	CHR_II	339		AN3256			1.70728	1.96797	-0.0259583	0.477127	1.46476	-0.441081
5	56804	Putative Purine and uridine phosphorylase	CHR_II	184	CHR_II	184					-1.76747	-3.8334	-2.72324	-3.2784	-4.44563	-4.84201
3	56840	Putative D-galactose dehydrogenase	CHR_II	24	CHR_II	24					2.58277	3.64747	5.34359	1.82588	2.65897	4.60559
3	56911	Putative Na+/proline transporter	CHR_II	35	CHR_II	35		AN7557			1.39456	2.0911	3.44227	0.988154	2.38582	4.88516
3	56996	Glycoside hydrolase family 5 MAN5A/MAN1	CHR_II	331	CHR_II	331		AN3297	NCU11952		2.52182	4.26915	5.24217	1.02378	2.25856	4.25678
4	57101	Putative GPCR PTH11-type receptor	CHR_II	341	CHR_II	341		AN3257			3.7087	4.13336	2.28435	2.04935	2.98675	-0.0689568
3	57179	Putative Glycoside hydrolase family 105	CHR_II	6	CHR_II	6		AN3196	NCU02654		2.24284	3.03793	4.20282	1.06997	1.94286	3.28248
2	57555	Putative Cytochrome P450	CHR_VII	1329	CHR_V	553		AN7359			1.28482	2.08042	2.4952	0.913887	1.60208	2.01325
5	57643	Putative MFS transporter	CHR_VII	1042	CHR_VII	1043					-1.50554	-1.2596	-2.52677	-1.43273	-1.58403	-5.85164
1	57737	Putative ER membrane protein PRO41	CHR_VII	996	CHR_VII	997		AN5458	NCU02767		-0.623208	-0.413027	-1.89451	-1.04523	-0.847221	-2.27486
4	58418	Putative Beta lactamase	CHR_IV	356	CHR_IV	362		AN12291			1.89586	2.11745	1.18547	0.781013	0.842272	-0.364484
1	58472	Putative Catalase	CHR_VII	1388	CHR_IV	383					-1.18449	-3.39459	-2.87997	-1.59481	-3.01264	-2.71944
4	58525	Putative Alginate lyase domain protein	CHR_IV	367	CHR_IV	373					1.68334	2.24022	1.36261	1.04995	1.45082	0.249679
1	58561	Putative MFS polyamine transporter	CHR_IV	354	CHR_IV	360	YOR273C	AN12129			-0.565257	-0.684538	-1.93009	-0.113657	-0.112393	-2.08503
5	58584	Putative Plasma membrane channel	CHR_IV	363	CHR_IV	369	YLL043W	AN3915			-2.72569	-2.0055	-2.81253	-3.63174	-3.02925	-4.65628
2	58601	Putative DUF3328 protein	CHR_VII	1820	CHR_I	1310					1.37067	1.84471	3.1327	0.88014	1.34936	2.85179
1	58603	Putative SAM and PH domain protein	CHR_VII	1400	CHR_I	890		AN5169	NCU07389		-0.908526	-0.758438	-1.60257	-1.2953	-0.995548	-2.05951
2	58774	Putative protein of unknown function	CHR_VII	1437	CHR_I	927		AN3750	NCU07508		1.35412	0.463565	1.56696	1.56763	1.16186	2.02617
1	58853	Putative protein of unknown function	CHR_VII	1735	CHR_I	1225			NCU05681		-0.475456	-0.343812	-0.995536	-1.14989	-0.580867	-2.62109
1	58952	Putative Calcium P-type ATPase	CHR_VII	1612	CHR_I	1102		AN2827	NCU04736		-0.60472	-1.08908	-1.54262	-0.496966	-0.778133	-2.286
2	59050	Putative Ankryn repeat protein	CHR_VII	1668	CHR_I	1158		AN3267			1.19133	1.90502	2.53434	1.26287	1.28992	2.59151
4	59065	Putative protein of unknown function	CHR_VII	1622	CHR_I	1112			NCU06413		0.649637	1.12224	0.244445	0.455375	1.31805	-1.74976
2	59119	Putative amidohydrolase	CHR_VII	1770	CHR_I	1260		AN8593			1.23801	2.36204	3.26298	0.843874	0.379501	3.04571
2	59152	Putative protein of unknown function	CHR_V	150	CHR_V	150					0.924718	0.549918	1.86566	1.51852	0.488926	2.34053
1	59388	Putative MFS maltose transporter	CHR_V	85	CHR_V	85			NCU01868		-0.602624	-0.688256	-1.48942	-0.470913	-0.752914	-2.16371
1	59482	Putative protein of unknown function	CHR_V	133	CHR_V	133		AN3612	NCU06013		-0.62175	-0.770686	-1.61801	-1.59927	-1.34603	-2.41093
2	59578	Putative Glycoside hydrolase family 13	CHR_V	165	CHR_V	165	YBR299W	AN4843	NCU06523		0.629242	1.91574	2.32006	0.382922	1.18798	2.34325
5	59628	Putative Glycoside hydrolase	CHR_V	349	CHR_V	349			NCU09647		-1.57769	-0.909848	-4.87742	-1.08525	-1.2423	-5.46802
2	59655	Putative S-adenosyl-L-methionine-dependent methyltransferase binding domain protein	CHR_V	23	CHR_V	23					2.05507	1.69211	2.30815	1.737	0.467827	3.53449
4	59690	Putative Secondary metabolite cluster enzyme	CHR_V	19	CHR_V	19		AN6444			3.26018	2.21902	2.49527	1.92529	1.09895	2.10354
1	59740	Putative Zn(2)Cys6 transcription factor	CHR_V	289	CHR_V	289		AN0766	NCU01931	TF	0.44253	0.499324	-0.416763	0.109669	0.777842	-1.32715
1	59778	Putative GPCR receptor	CHR_V	309	CHR_V	309					-0.639018	-0.508633	-1.56303	-0.484544	0.00661656	-2.34488
2	59827	Putative GCN5-related N-acetyltransferase	CHR_VII	335	CHR_VII	335					0.536773	0.630035	1.32443	0.755501	0.753623	2.36736
2	60182	Putative Protein kinase domain protein	CHR_VII	85	CHR_VII	85					1.62476	0.9798	1.23249	1.03378	1.41548	2.09793
1	60352	Putative FAD/NAD(P)-binding domain protein	CHR_VII	65	CHR_VII	65					-0.682828	-2.17429	-2.19401	-1.10103	-1.77484	-1.67091
2	60374	Putative Choline oxidase	CHR_VII	11	CHR_VII	11					0.181014	0.551105	1.30732	-0.78175	0.243853	1.44312
3	60378	Putative Mitochondrial chaperone BCS1	CHR_VII	247	CHR_VII	247			NCU03767		2.27914	2.87161	3.68188	2.07149	2.20123	3.04757
2	60419	Putative Acid phosphatase	CHR_VII	24	CHR_VII	24		AN2360	NCU08643		-1.16318	-1.38563	-0.229367	-0.5379	-1.66763	1.52699
1	60493	Putative Ribosomal RNA methyltransferase	CHR_VII	175	CHR_VII	175		AN5539			-0.499453	-0.703043	-0.88462	-0.331429	-0.937297	-2.17383
2	60518	Putative Short chain dehydrogenase	CHR_VII	9	CHR_VII	9		AN1300			0.550968	0.569644	1.81241	0.235721	0.719571	3.94577
1	60565	Putative Zn(2)Cys6 transcription factor (fungal specific)	CHR_VII	39	CHR_VII	39		AN3502		TF	-0.74157	-0.675373	-1.48835	-0.447236	-0.511846	-2.08139
5	60635	Putative Glycoside hydrolase family 92	CHR_VI	755	CHR_VI	755		AN1197	NCU07269		-3.29214	-3.20471	-5.6381	-3.7606	-4.08673	-5.59204
4	60638	Putative protein of unknown function	CHR_VI	737	CHR_VI	737					2.69803	2.75887	1.14781	1.48133	1.42569	-0.188182
4	60751	Putative Non-ribosomal peptide synthetase	CHR_VI	735	CHR_VI	735					2.32294	2.78598	1.58991	0.891538	1.18499	2.12951
2	60773	Putative Ankryn repeat protein	CHR_VI	673	CHR_VI	673					1.60717	1.27311	2.14419	1.52964	1.45436	2.52969
5	60810	Putative Acetate transporter	CHR_VI	813	CHR_VI	813		AN7317			-1.18801	-4.86482	-4.77073	-2.58539	-5.12718	-3.60632
1	61055	Putative protein of unknown function	CHR_VI	753	CHR_VI	753		AN4005	NCU01230		-1.28949	-0.512806	-1.03029	-0.946021	-2.31634	-4.17088
2	61066	Putative Glucose-methanol-choline oxidoreductase	CHR_VI	664	CHR_VI	664		AN4006			-1.08432	0.477286	1.56171	0.250769	1.04997	3.08567
1	61097	Putative protein of unknown function	CHR_VI	933	CHR_VI	933		AN7961	NCU05070		-0.923656	-1.07779	-2.32865	-0.532826	-1.39907	-3.64615
2	61293	Putative lipase/esterase	CHR_VI	761	CHR_VI	761		AN1433	NCU00761		0.596071	1.26441	1.92493	0.869155	1.16784	2.27743
1	61496	Putative MFS transporter	CHR_I	829	CHR_I	828			NCU02522		-0.605801	-0.468601	-1.36352	-0.986849	-0.864494	-2.0723
2	61504	Putative FMN-binding split barrel domain protein	CHR_I	786	CHR_I	785		AN0876	NCU00236		0.941951	1.43993	2.56764	1.53345	1.93166	3.46862
1	61526	Putative protein of unknown function	CHR_I	559	CHR_I	558					-1.56975	-1.38249	-1.83915	-1.75832	-2.4442	-2.10305
1	61576	Putative protein of unknown function	CHR_I	550	CHR_I	541		AN0904	NCU06467		-1.19262	-1.2233	-1.78008	-1.74846	-1.46211	-2.17226
2	61593	Putative protein of unknown function	CHR_I	7	CHR_I	544					-2.8489	-1.88417	1.7466	-2.47093	-3.16279	0.101906
3	61830	Putative protein of unknown function	CHR_I	592	CHR_I	591			NCU05256		1.83451	2.56156	3.41857	1.63652	2.51135	3.5728
2	62153	Putative NAD-dependent malic enzyme MAE1	CHR_VI	503	CHR_VI	503	YKL029C	AN6933	NCU02906		1.24735	0.935961	1.92706	1.08182	0.413269	2.14665
2	62255	Putative Alpha/beta-hydrolase	CHR_VI	364	CHR_VI	364					-0.834151	0.0292593	1.38813	1.08837	1.74046	2.37384
1	62285	Putative Sulfate permease	CHR_VI	527	CHR_VI	527					-0.337771	0.0692682	-1.60111	-0.121102	0.209623	-2.32727
4	62463	Putative FAD/NAD(P)-binding domain monooxygenase	CHR_VI	337	CHR_VI	337					2.09783	1.51603	1.24003	1.914	1.41527	1.27669
1	62488	Putative MFS transporter	CHR_VI	309	CHR_VI	309	YBR008C	AN2675	NCU05580		-1.31478	-1.33255	-1.99085	-1.77159	-1.76551	-2.69131
1	62522	Putative protein of unknown function	CHR_VI	252	CHR_VI	252		AN10907			-0.530077	-1.92429	-2.50208	-0.769815	-1.96107	-2.91998
1	63217	Putative protein of unknown function	CHR_V	1146	CHR_V	1455					0.310244	0.610794	-1.21944	0.0629579	0.525105	-1.95659
2	63240	Putative protein of unknown function	CHR_V	1047	CHR_V	1356					0.796754	1.32471	2.20024	0.486934	1.27829	2.40456
2	63290	Putative protein of unknown function	CHR_V	1203	CHR_V	1512					0.565247	0.918423	1.5223	0.199121	0.923235	2.03491
1	63526	Putative protein of unknown function	CHR_VII	479	CHR_VII	479					-1.63321	-2.20615	-2.45115	-1.48442	-1.1392	-3.449
1	63653	Putative Ankryn repeat protein	CHR_VII	560	CHR_VII	560		AN8019	NCU06965		-0.211179	-1.07398	-1.56152	-0.882819	-1.66321	-2.68494
1	63868	Putative protein of unknown function	CHR_VII	536	CHR_VII	536			NCU04214		0.529927	-1.18338	-0.937579	0.343079	-0.937176	-2.5578
1	63981	Putative GPCR receptor	CHR_IV	116	CHR_IV	122					-1.36516	-1.65416	-2.03268	-1.75705	-1.32132	-2.90487
1	64018	GPCR class I Mating type pheromone receptor Ste3-like HPR1	CHR_IV	154	CHR_IV	160	YFL026W	AN2520	NCU05758		-0.989716	-0.561279	-2.08373	-1.07483	-0.504241	-3.18971
1	64066	Putative Acetyltransferase	CHR_IV	285	CHR_IV	291			NCU08231		-0.789334	-1.20953	-1.59908	-0.943131	-1.14908	-2.55087
1	64125	Putative Protein kinase	CHR_IV	199	CHR_IV	205	YDR507C	AN11101	NCU09064		-0.406394	-1.4017	-1.18794	-1.32809	-2.5758	-2.51074
1	64308	Putative protein of unknown function	CHR_IV	277	CHR_IV	283		AN3803	NCU00923		0.409996	-0.00867722	-1.20206	0.578351	-0.0600199	-1.42047
1	64448	Putative protein of unknown function	CHR_VI	1148	CHR_VI	1148		AN10090	NCU04732		-0.756871	-0.62873	-1.69649	-1.01763	-0.671974	-2.21299
1	64869	Putative Cytochrome P450	CHR_VI	1338	CHR_VI	1338					-1.78304	-1.74952	-2.29292	-3.53017	-1.73931	-1.66239
1	64874	Putative MFS transporter	CHR_VI	1197	CHR_VI	1197		AN8095	NCU09640		-0.616352	-1.72002	-3.55274	-0.634202	-1.77211	-2.50671
1	64900	Putative Cytochrome P450	CHR_I	193	CHR_I	186					-0.322698	-0.652376	-1.29715	-0.81634	-0.805603	-2.89008
1	64922	Putative protein of unknown function	CHR_I	97	CHR_I	90					-1.14495	-1.13433	-1.53232	-1.1982	-2.31203	-1.61858
3	64937	Putative Dehydrogenase	CHR_I	175	CHR_I	168		AN1650			2.16557	3.52532	4.64693	1.79303	2.19455	4.70974
2	65039	Putative protein of unknown function	CHR_I	46	CHR_I	39		AN2330			-0.939372	0.719062	2.71935	-0.569843	-0.035818	2.98067
1	65055	Putative Fatty acid desaturase	CHR_I	152	CHR_I	145		AN4592	NCU02408		-1.21063	-2.12931	-2.48624	-1.96695	-2.12804	-2.24518
2	65106	Putative Hydrolase	CHR_I	149	CHR_I	142					1.72274	2.24316	3.29385	0.529484	1.23882	1.78846
3	65137	Putative Glycoside hydrolase family 64	CHR_I	196	CHR_I	189					-0.0515879	3.03663	4.04689	2.06193	1.66701	4.88648
2	65141	Putative Cytochrome P450	CHR_I	188	CHR_I	181					0.834193	1.64399	2.22712	0.355165	1.0982	1.84193
1	65162	Putative Glycoside hydrolase family 18 CHI18-rel1	CHR_I	142	CHR_I	135			NCU12033		-1.22894	-0.490362	-2.70506	-1.69082	-1.31131	-3.18974
2	65380	Putative Glycoside hydrolase family 47	CHR_II	612	CHR_II	612			NCU05836		0.812609	1.31926	2.11971	0.552227	1.31551	1.79501
1	65483	Putative Cu/Zn superoxide dismutase	CHR_II	708	CHR_II	708		AN1131	NCU03013		-1.05945	-1.29192	-1.71626	-1.36302	-1.24384	-2.52087
1	65522	Putative protein of unknown function	CHR_II	690	CHR_II	690					-0.511533	-0.75266	-2.09066	-0.134702	-0.244128	-2.64721
5	65711	Putative S-adenosylmethionine-dependent methyltransferase	CHR_IV	785	CHR_IV	795		AN5415	NCU10490		-1.82142	-2.73542	-2.92911	-2.59836	-3.28151	-3.4725
1	65741	Putative protein of unknown function	CHR_IV	936	CHR_IV	946		AN0964	NCU11172		-1.21709	-1.20698	-1.79893	-0.962343	-1.01846	-2.48114
2	65925	Putative Cytidine deaminase	CHR_IV	907	CHR_IV	917					1.35673	2.10591	2.34916	1.31438	1.21428	1.90088
1	65965	Putative Phosphoethanolamine N-methyltransferase	CHR_IV	784	CHR_IV	794			NCU02648		-0.361895	-0.532773	-1.37096	-0.735964	-0.730578	-2.19334
4	66041	Putative Glycoside hydrolase family 18	CHR_IV	860	CHR_IV	870					2.06089	2.85569	1.67975	0.883292	1.75024	1.09548
4	66228	Putative protein of unknown function	CHR_III	844	CHR_III	846					2.19491	3.23454	2.93468	1.25931	2.10918	1.95106
3	66370	Putative Ribonuclease H-like	CHR_III	921	CHR_III	923					2.72123	3.85319	5.27669	2.3042	2.90265	4.33318
1	66592	Putative Fumarylacetoacetate hydrolase	CHR_IV	1049	CHR_IV	1059		AN12441	NCU08018		-0.343653	-0.581573	-0.81425	-0.693937	-0.222846	-2.61375
1	66614	Putative Epoxide hydrolase	CHR_IV	1141	CHR_IV	1151	YNR064C				-0.164281	-0.590956	-1.0126	-0.316479	-0.792611	-2.19535
2	66616	Putative protein of unknown function	CHR_IV	1144	CHR_IV	1154		AN9186			0.378489	0.59557	1.50241	0.192659	0.582898	2.31605
2	66662	Putative Enolase C-terminal domain protein	CHR_IV	1062	CHR_IV	1072					0.992322	2.16407	3.39364	0.822209	1.8812	3.10474
2	66689	Putative Adenine deaminase/adenosine deaminase	CHR_IV	1098	CHR_IV	1108					0.987439	1.21605	1.99804	0.896696	1.51461	2.10996
2	66751	Putative Dehydrogenase	CHR_IV	1092	CHR_IV	1102		AN8299			0.835627	1.73608	2.5473	1.51642	2.42111	2.84321
3	66766	Putative Nitrilase	CHR_IV	1131	CHR_IV	1141					2.1107	2.85062	3.90582	1.32109	1.99634	2.92844
5	66788	Putative protein of unknown function	CHR_IV	1000	CHR_IV	1010			NCU01071		-1.48416	-3.91309	-4.31065	-3.06624	-3.5636	-4.88544
1	66819	Putative Amino acid transporter	CHR_IV	1035	CHR_IV	1045					-1.49819	-1.14606	-2.58958	-1.74239	-1.26707	-4.25096
2	66854	Putative MFS monocarboxylate transporter	CHR_IV	1121	CHR_IV	1131					0.300044	0.787408	2.20167	1.04091	0.0870961	2.33936
5	66935	Putative Phosphatidylserine decarboxylase	CHR_IV	673	CHR_IV	684					-0.467709	-1.96473	-2.92511	-1.74402	-2.99967	-4.96891
4	66999	Putative Acetyl-CoA synthetase	CHR_IV	721	CHR_IV	732		AN5272			3.712	5.15366	3.80584	0.128249	1.08566	1.58787
1	67024	Putative protein of unknown function	CHR_IV	662	CHR_IV	673		AN6116	NCU00321		-1.17713	-1.65711	-2.531	-1.7508	-1.67263	-3.67481
1	67084	Putative protein of unknown function	CHR_IV	692	CHR_IV	703		AN8146			-0.47597	-0.534642	-1.62451	-1.03573	-1.01821	-2.88974
1	67377	Putative protein of unknown function	CHR_VII	834	CHR_VII	834					-1.46619	-1.56167	-2.52009	-1.55242	-1.19011	-3.60996
3	67541	Putative MFS transporter	CHR_I	889	CHR_VII	841	YJR160C	AN7344	NCU08858		2.20991	3.27185	4.70308	1.01454	2.32092	3.89772
1	67562	Putative Plasma membrane high-affinity zinc transporter ZRT1	CHR_I	844	CHR_I	843	YGL255W	AN8337	NCU07621		-0.287392	-0.555632	-1.6154	-0.445755	-0.854277	-2.47252
1	67738	Putative protein of unknown function	CHR_I	875				AN2580			0.163292	0.185612	-1.07196	0.410537	0.921796	-1.6574
1	67795	Putative Ankryn repeat protein	CHR_I	946	CHR_VII	1069		AN5168	NCU05316		-1.31671	-0.832762	-0.0580048	-1.63893	-2.15583	-1.24959
2	68028	Putative protein of unknown function	CHR_VI	1350	CHR_VI	1350					1.32694	1.99887	3.25464	1.5236	1.73796	3.28522
1	68347	Putative Glycoside hydrolase family 18 CHI18-16	CHR_II	871	CHR_II	871					-1.82343	-0.907449	-3.18329	-1.26953	-0.948486	-3.03861
5	68371	Putative Protein kinase domain protein	CHR_II	872	CHR_II	872					-1.46924	-4.12715	-3.82792	-2.2864	-3.08593	-5.65163
5	68574	Putative protein of unknown function	CHR_VI	200	CHR_VI	200		AN3528			-0.938294	-3.27395	-3.10571	-1.89952	-3.65803	-2.42161
2	68588	Putative Oxidoreductase	CHR_VI	162	CHR_VI	162		AN8634			-0.352049	-0.676649	1.02615	-0.483383	-0.482146	1.98986
2	68831	Putative Amino acid transporter	CHR_VI	1056	CHR_VI	1056	YHL036W	AN2560			0.460996	0.990527	2.30287	0.716475	0.85373	2.85701
1	69066	Putative Apha/beta hydrolase	CHR_VI	1635	CHR_VI	1635		AN7233			-1.20235	-2.38337	-3.33928	-0.732782	-1.72327	-3.28704
2	69115	Putative Dienelactone hydrolase	CHR_VI	1627	CHR_VI	1627		AN0234	NCU02124		0.0814719	-0.364043	0.816583	-0.24109	-0.129666	2.6967
2	69171	Putative Zinc alcohol dehydrogenase	CHR_VI	1629	CHR_VI	1629		AN10947	NCU04940		1.43546	1.65264	2.83523	1.09695	0.816886	2.75583
5	69181	Putative protein of unknown function	CHR_VI	1695	CHR_VI	1695					0.0690349	-3.21644	-7.53523	-1.9785	-7.72246	-6.72957
3	69276	Glycoside hydrolase family 30 XYN6	CHR_VI	1692	CHR_VI	1692					2.22515	3.75151	4.38675	0.856284	1.96197	2.89512
2	69479	Putative protein of unknown function	CHR_II	965	CHR_II	965					0.355537	0.869365	2.28527	0.207827	0.670626	1.94878
1	69483	Putative protein of unknown function	CHR_II	1008	CHR_II	1008					-0.482524	-0.627341	-2.17285	-0.807889	-0.514709	-3.15458
2	69529	Putative Alpha-ketoglutarate-dependent taurine dioxygenase	CHR_II	1004	CHR_II	1004		AN4111	NCU07819		0.896863	1.63326	2.63886	1.19836	2.27629	2.70412
1	69555	Putative scytalidopepsin B	CHR_II	1006	CHR_II	1006					0.188304	-0.165592	-1.74411	-0.425381	-0.953577	-3.34621
2	69563	Putative MFS transporter	CHR_II	1003	CHR_II	1003		AN4109	NCU07820		1.29574	1.5747	2.38919	3.43124	1.85503	4.55205
3	69569	Putative protein of unknown function	CHR_II	975	CHR_II	975					2.19922	2.76497	4.23649	1.06698	1.38866	3.38096
5	69625	Putative Metallo-beta-lactamase	CHR_II	920	CHR_II	920		AN7070			-0.121556	-2.40577	-4.33719	-2.8759	-2.60125	-3.44437
3	69648	Putative Monooxygenase	CHR_II	1018	CHR_II	1018					2.17215	2.75549	3.33294	1.9388	2.74945	3.37612
5	69650	Putative protein of unknown function	CHR_II	915	CHR_II	915		AN7075			-0.335749	-2.4914	-4.71212	-2.80523	-2.67435	-3.9268
5	69652	Putative protein of unknown function	CHR_II	921	CHR_II	921		AN12288			-0.196559	-2.34119	-5.05857	-3.15474	-3.22645	-4.37944
1	69692	Putative Quinoprotein amine dehydrogenase	CHR_III	997	CHR_III	995			NCU05626		-0.505053	-0.70551	-0.880317	-1.92356	-2.75219	-2.69565
2	69696	Putative Monooxygenase	CHR_III	1039	CHR_III	1037		AN12294			1.04392	1.31327	1.97856	1.33729	1.69147	2.8009
5	69742	Putative Esterase	CHR_III	1063	CHR_III	1061		AN7130			-3.10279	-5.68284	-10.3568	-4.27109	-7.18548	-7.80893
2	69834	Putative MFS transporter	CHR_III	1065	CHR_III	1063		AN10487			-0.225137	-0.22075	1.25502	-0.126845	0.131478	2.27782
3	69868	Putative Glycosyltransferase family 15	CHR_VI	36	CHR_VI	36					2.19909	3.16038	3.94289	1.95425	2.36566	3.41107
2	69870	Putative Phenol 2-monooxygenase.	CHR_VI	27	CHR_VI	27					1.25836	1.01258	1.34234	1.31811	2.05172	2.64028
2	69901	Putative MFS transporter	CHR_VI	2	CHR_VI	2					-0.118217	0.171238	2.89761	-0.670599	0.699313	5.23719
1	69904	Putative GPCR PTH11 type receptor	CHR_VI	66	CHR_VI	66		AN8951	NCU08718		-0.983203	-1.30252	-1.97542	-1.14241	-1.37337	-2.17236
3	69944	Putative Glycoside hydrolase family 31	CHR_VI	15	CHR_VI	15		AN7505			2.54694	3.69958	5.08695	1.70944	2.71527	4.09176
2	69956	Putative Alcohol dehydrogenase	CHR_VI	60	CHR_VI	60		AN8628			1.5804	0.288679	1.89921	1.48488	-0.053865	2.98421
3	69957	Putative MFS sugar transporter (D-Xylose)	CHR_VI	16	CHR_VI	16					3.31344	5.23698	7.10176	2.2757	3.98817	5.92752
1	70021	Putative Carbohydrate Esterase family 3	CHR_V	1285	CHR_V	1594		AN4573	NCU04526		-0.344148	-0.102787	-1.72724	-1.12628	-0.558038	-2.65948
2	70108	Putative MFS transporter	CHR_IV	28	CHR_IV	29					0.192437	0.623489	1.20517	0.324834	0.89449	2.10884
1	70319	Putative MFS transporter	CHR_V	1330	CHR_V	1639		AN10207			-0.419306	-0.948114	-2.05434	-1.99497	-0.972346	-2.43472
1	70500	Putative protein of unknown function	CHR_I	426	CHR_I	417					-0.567367	-1.75981	-1.33501	-1.01861	-1.98886	-2.43319
5	70803	Putative Bifunctional catalase / peroxidase	CHR_VI	69	CHR_VI	69					-2.1478	-2.4443	-4.42301	-1.87655	-3.21043	-3.82097
2	70830	Putative MFS transporter	CHR_VI	80	CHR_VI	80		AN5329			0.269856	0.330398	1.48636	0.473896	0.909772	2.94862
1	70842	Putative Cytochrome P450	CHR_III	983	CHR_III	981		AN6101			-0.704742	-1.34588	-2.15861	-0.968615	-1.21107	-3.74347
1	70845	Putative Glycoside hydrolase family 55	CHR_III	992	CHR_III	990			NCU05105		-0.904018	-0.823593	-1.21464	-1.43995	-0.947564	-2.12136
1	70907	Putative Ankryn repeat protein	CHR_I	249	CHR_I	242					-1.31394	-1.71307	-2.34143	-1.46036	-1.30702	-3.27332
1	70919	Putative Guanyl-specific ribonuclease	CHR_I	245	CHR_I	238		AN1723	NCU01045_1		-0.524807	-1.14567	-3.50181	-1.24568	-1.94087	-3.29874
4	70933	Putative MFS transporter	CHR_V	1350	CHR_V	1661		AN1110			1.89697	2.14129	2.01686	1.11144	1.89372	1.22397
3	70934	Putative Oligopeptide transporter	CHR_V	1354	CHR_V	1666	YPR194C		NCU11987		0.700528	1.90292	3.61211	0.197339	1.22606	5.07847
2	70956	Putative Cytochrome P450	CHR_V	1346	CHR_V	1657		AN7772			0.957285	1.84143	2.44393	1.12251	2.43181	3.28646
3	70967	Putative GPCR PTH11 type receptor	CHR_III	1095	CHR_III	1093		AN6419	NCU06328		3.12545	3.22056	3.71119	2.63683	3.12509	3.2282
1	70972	Putative MFS transporter	CHR_III	1092	CHR_III	1090					-0.15272	-1.6126	-2.2874	-1.30933	-3.59671	-2.75751
4	70973	Putative GCN5-related N-acetyltransferase	CHR_III	1097	CHR_III	1095					2.53591	2.1881	2.46216	3.02277	3.09594	2.73947
4	70984	Putative Cytochrome P450	CHR_III	1094	CHR_III	1092			NCU11725		2.72576	2.77038	2.64874	2.35857	2.62635	2.02871
3	70998	Putative Amino acid transporter	CHR_III	1096	CHR_III	1094					2.85977	3.07009	3.79939	2.47181	3.25896	3.74175
2	71103	Putative protein of unknown function	CHR_III	964	CHR_III	966		AN1309			-0.399555	0.243923	1.66081	0.0884918	0.74291	3.03651
1	71394	Putative Glycoside hydrolase family 79	CHR_III	56	CHR_III	58					0.755787	0.318014	-2.09033	0.0118526	-0.208048	-2.94581
2	71399	Putative Glycoside hydrolase family 16	CHR_III	30	CHR_III	32					0.315823	-0.535703	0.650618	0.665705	-0.23319	2.08937
1	72086	Putative Zn-dependent exopeptidase	CHR_IV	1151	CHR_IV	1161		AN10986			-0.568662	-1.90855	-2.5637	-1.21423	-2.56309	-2.9731
1	72091	Putative protein of unknown function	CHR_V	376	CHR_V	376					-1.07115	-1.33243	-1.99154	-1.31287	-1.38665	-2.53707
2	72339	Putative Glycoside hydrolase family 18 CHI18-9	CHR_I	976	CHR_VII	811		AN0509	NCU04482		0.150957	1.07638	2.22441	0.0745303	0.961887	3.3264
2	72526	Glycoside hydrolase family 67 GLR1	CHR_III	738	CHR_III	740		AN9286	NCU07351		1.5229	2.11371	2.35822	0.942409	1.52906	2.09166
3	72567	Glycoside hydrolase family 6 CBH2/CEL6A	CHR_II	4	CHR_II	4		AN1273	NCU09680		2.37066	4.01973	5.22945	1.18706	2.4525	4.3798
2	72581	Putative protein of unknown function	CHR_II	54	CHR_II	54			NCU07978		1.91366	1.93353	2.5412	1.45902	1.31676	2.42265
2	72704	Glycoside hydrolase family 27 AGL3	CHR_III	1064	CHR_III	1062					0.502688	1.39422	2.76077	0.245984	0.970413	4.21902
2	72780	Putative protein of unknown function	CHR_VI	976	CHR_VI	976					-0.608729	-0.274975	1.37075	-0.532903	-0.468333	2.01516
3	73005	Putative Glycoside hydrolase family 79	CHR_VII	1765	CHR_I	1255					-0.238922	3.16024	3.85838	1.03924	1.40955	3.41899
1	73048	Putative protein of unknown function	CHR_VII	1574	CHR_I	1064		AN3998			-0.936812	-1.32745	-1.6024	-1.75085	-1.78874	-2.09701
2	73250	Putative Urea transporter	CHR_VII	185	CHR_VII	185					0.190087	-0.0865318	1.24048	3.69884	3.51867	4.91839
2	73344	Putative Cytochrome P450	CHR_VI	736	CHR_VI	736					2.26991	2.70925	2.49804	-0.409414	0.0379011	2.3284
2	73632	Carbohydrate esterase family 5 AXE1	CHR_III	538	CHR_III	540					1.48972	1.93812	2.87515	1.23307	1.38419	2.80063
3	73638	hydrolase CIP1	CHR_III	537	CHR_III	539					2.61281	3.75974	5.02416	1.87038	2.62193	4.45181
3	73643	Glycoside hydrolase family 61 EGL4/CEL61A	CHR_III	536	CHR_III	538					1.43982	2.73301	3.76708	1.20888	1.97473	3.71839
2	73678	Putative Calnexin CNE1	CHR_III	507	CHR_III	509	YAL058W	AN3592	NCU09265		0.846873	1.3591	2.17018	0.530593	1.16491	2.24297
2	73792	Putative Zn(2)Cys6 transcription factor	CHR_III	411	CHR_III	413		AN9373	NCU03931	TF	0.369195	0.722519	1.3927	0.352452	0.50428	2.11389
1	73897	Putative chymotrypsin	CHR_III	323	CHR_III	325		AN2366			-0.15753	0.18314	-0.847013	0.03985	0.03874	-2.10496
1	74156	Putative pepsin	CHR_III	80	CHR_III	82					-1.7828	-2.5139	-3.18188	-1.28657	-1.44384	-2.19506
1	74194	D-mannitol 2-dehydrogenase LXR1	CHR_III	36	CHR_III	38		AN7590	NCU09041		-0.261523	-2.35665	-1.25304	0.096301	-1.84934	-0.967694
3	74223	Glycoside hydrolase family 11 XYN1	CHR_I	408	CHR_III	1					3.37467	3.62211	5.05684	2.30666	2.41035	3.87234
5	74228	Putative Bifunctional D12/D15 fatty acid desaturase	CHR_I	398	CHR_I	391		AN7204	NCU09497		-2.29124	-2.72688	-4.05919	-2.61902	-2.78227	-4.94361
5	74282	Putative Cell wall protein QID74	CHR_I	304	CHR_I	297					-1.87176	-3.71074	-4.80233	-0.169743	-1.22158	-6.46256
1	74580	Putative protein of unknown function	CHR_V	416	CHR_V	416			NCU03153		-1.09974	-1.53403	-1.57766	-1.36369	-1.11376	-2.04171
2	75380	Putative MFS transporter	CHR_II	310	CHR_II	310					1.50633	2.08464	2.59448	0.708805	1.48725	2.13167
1	75529	Putative Deoxyuridine 5'-triphosphate nucleotidohydrolase	CHR_II	474	CHR_II	474	YBR252W	AN0271	NCU10893		-0.804141	-1.16548	-1.74289	-0.717253	-0.790963	-2.13566
1	76065	Putative Glycoside hydrolase family 61	CHR_VII	1224	CHR_V	658					-0.889364	-0.414883	-2.49992	-1.15993	-0.987757	-3.72204
1	76151	Putative Glycosyltransferase family 31	CHR_VII	1314	CHR_V	568			NCU07762		-0.826743	-3.69295	-1.23635	-3.3967	-3.9739	-1.47432
1	76155	Putative Acid phosphatase	CHR_VII	1317	CHR_V	565		AN4055	NCU03404		-1.43911	-1.6261	-2.32008	-1.55444	-1.35496	-2.35296
3	76210	Glycoside hydrolase family 62 ABF2	CHR_VII	1806	CHR_I	1296		AN7908			2.88995	4.85493	6.64698	2.43257	4.02423	5.95838
4	76227	Glycoside hydrolase family 3 CEL3E	CHR_VII	1782	CHR_I	1272					1.7545	2.13834	2.3414	1.41	2.07868	1.52689
2	76360	Putative protein of unknown function	CHR_VII	1617	CHR_I	1107					1.25024	1.87822	2.79388	0.903647	1.60362	2.47204
1	76590	Putative Zn(2)Cys6 transcriptional regulatory protein PRO1	CHR_VII	1401	CHR_I	891		AN5170	NCU07392	TF	-0.760659	-0.845967	-1.62313	-1.17632	-0.943512	-2.01989
5	76601	Putative Sulfite oxidase	CHR_VII	1389	CHR_IV	384			NCU04474		-1.24497	-4.4656	-3.30933	-2.4516	-4.9443	-3.15603
2	76641	Putative MFS transporter	CHR_IV	350	CHR_IV	356		AN7936	NCU00875		0.656873	0.956853	2.02576	0.522599	1.05508	2.82918
4	76672	Glycoside hydrolase family 3 BGL1 / CEL3A (N. crassa, bgl2)	CHR_V	29	CHR_V	29					0.960846	2.31786	1.23583	-0.684678	0.200657	-0.285302
2	76722	Putative protein of unknown function	CHR_V	125	CHR_V	125	YGR234W	AN7169	NCU02096		1.53881	1.92807	2.51904	1.13212	1.77652	2.84444
1	76852	Putative Glycoside hydrolase family 2	CHR_V	265	CHR_V	265		AN2395	NCU00985		1.06431	1.13825	-0.801358	-0.848588	-0.449689	-3.73569
1	76995	Putative protein of unknown function	CHR_VII	372	CHR_VII	372		AN8526			-2.3885	-3.12665	-2.91723	-2.09119	-2.68164	-2.70029
1	77283	Putative Glycosyltransferase family 2	CHR_VII	58	CHR_VII	58					-0.969998	-1.65806	-2.27947	-1.34382	-1.85948	-2.8565
1	77284	Putative Glycoside hydrolase family 12	CHR_VII	57	CHR_VII	57			NCU08227_1		-1.24946	-1.95117	-2.47284	-1.19514	-1.81747	-2.96705
1	77299	Putative Glycoside hydrolase family 2	CHR_VII	40	CHR_VII	40		AN11680	NCU09042		-0.808861	-0.86506	-1.72704	-1.33407	-1.18942	-2.54944
1	77512	Putative Cytochrome P450 protein	CHR_VI	701	CHR_VI	701		AN8004	NCU05006		-1.22691	-1.8097	-2.13754	-1.62742	-1.80742	-2.24925
4	77513	Fungal transcription factor activator of cellulase ACE3	CHR_VI	705	CHR_VI	705				TF	1.66574	2.46714	2.25195	0.962673	1.48765	1.01671
1	77547	Putative Glycosyltransferase family 1	CHR_VI	744	CHR_VI	744		AN6433			0.364294	-0.155697	-1.52836	-0.324597	-0.731749	-2.39052
2	78072	Putative Carbon nitrogen ligase	CHR_I	554	CHR_I	553					1.44857	1.68957	2.66783	0.688859	1.07622	3.88497
1	78462	Putative L-carnitine dehydratase	CHR_VI	291	CHR_VI	291		AN3895	NCU00052		-0.0551535	-2.18639	-2.05553	-0.798071	-1.32439	-1.51877
3	79202	Putative protein of unknown function	CHR_IV	117	CHR_IV	123		AN7240			2.86795	3.37163	3.50296	2.09386	2.79584	3.39112
1	79671	Putative Carbohydrate Esterase family 9	CHR_VI	1157	CHR_VI	1157		AN1428	NCU04725		-1.49947	-2.13931	-2.19184	-1.8507	-2.06635	-1.98877
1	80019	Putative NAD(P)-binding Rossmann-fold domain protein	CHR_II	720	CHR_II	720		AN5653			-1.06744	-1.52844	-2.17511	-1.89734	-1.767	-3.52684
5	80026	Putative protein of unknown function	CHR_II	726	CHR_II	726			NCU07017		-1.66051	-2.47316	-4.21867	-2.60575	-2.61632	-4.55466
2	80056	Putative RNA-3'-phosphate cyclase	CHR_II	759	CHR_II	759		AN7762	NCU00604		0.295233	0.985398	1.3687	0.305301	0.559799	2.49872
3	80086	Putative MFS peptide transporter	CHR_IV	953	CHR_IV	963	YKR093W	AN8903	NCU08738		4.57591	4.53972	7.41497	4.28996	4.57504	6.44393
3	80240	Glycoside hydrolase family 35 BGA1	CHR_IV	794	CHR_IV	804		AN0756	NCU00642		1.67608	2.8228	3.4241	1.1817	2.2722	2.99905
1	80335	Putative NAD(P)-binding Rossmann-fold domain protein	CHR_III	927	CHR_III	929					-1.03347	-1.9074	-1.99552	-0.340866	-0.909917	-2.15429
1	80340	Putative Putative Alpha-1,6-mannosyltransferase HOC1	CHR_III	912	CHR_III	914					-0.00184078	0.904392	-0.23949	-0.684747	0.216056	-2.13264
1	80528	Putative protein of unknown function	CHR_IV	1004	CHR_IV	1014	YNL182C	AN12438	NCU00560		-1.13789	-1.47639	-1.98566	-1.48764	-1.52401	-2.4272
5	80654	Putative Glycosyltransferase family 1	CHR_IV	1128	CHR_IV	1138		AN1607	NCU07473		-1.23451	-3.24442	-3.26601	-2.19129	-3.23155	-2.58577
2	80659	Putative Alcohol oxidase	CHR_IV	1137	CHR_IV	1147		AN0567	NCU01853		-0.192236	0.888759	2.52625	0.232084	1.28769	2.6715
1	80863	Putative MFS transporter	CHR_VII	851	CHR_VII	851		AN1427	NCU09771		-1.41218	-0.996079	-2.22097	-1.75371	-1.03835	-2.45133
1	80973	Putative protein of unknown function	CHR_VII	758	CHR_VII	758					0.975639	0.266203	-0.600892	0.522146	-0.696778	-1.81331
1	80980	Putative Pentein	CHR_VII	751	CHR_VII	751					-0.851114	-1.7282	-2.02618	-1.66948	-2.44651	-3.15824
5	81082	Putative Aquaporin	CHR_I	920	CHR_VII	3					-2.07915	-2.21483	-3.57176	-3.43134	-2.19527	-3.73999
1	81122	Putative protein of unknown function	CHR_I	957	CHR_VII	14					-1.34937	-2.26508	-2.11695	-2.03517	-2.54505	-2.80698
2	81148	Putative protein of unknown function	CHR_VI	1473	CHR_VI	1473		AN0675	NCU07240		1.30038	1.50394	1.98427	1.20938	1.2399	2.00507
1	81149	Putative F-box protein	CHR_VI	1471	CHR_VI	1471		AN10347			-0.669029	-0.901514	-1.34818	-1.06018	-1.05321	-2.05192
5	81383	GPCR class VI RGS type receptor RgsA	CHR_II	845	CHR_II	845		AN7795	NCU09883		-1.83776	-2.23523	-2.93497	-2.37099	-2.42739	-3.65296
2	81586	Putative protein of unknown function	CHR_VI	1026	CHR_VI	1026		AN6423	NCU02329		-0.68104	-1.72056	0.351884	-0.517337	-1.05091	2.08718
5	81964	Putative Polyketide synthase	CHR_II	919	CHR_II	919					-0.262351	-2.18204	-4.1851	-3.30333	-2.90245	-2.9092
2	82068	Putative Stress response protein	CHR_III	1049	CHR_III	1047		AN7165			0.308805	0.315282	1.61927	0.0586992	0.393623	2.11251
2	82227	Glycoside hydrolase family 3 CEL3C	CHR_IV	42	CHR_IV	43					1.55881	2.1096	2.23971	0.684577	1.18838	1.91219
1	82235	Putative Glycoside hydrolase family 31	CHR_IV	46	CHR_IV	47		AN8953	NCU04674		-0.0131743	0.0792573	-1.48192	-0.877778	-0.454695	-2.40686
2	82633	Putative Glycoside hydrolase family 72	CHR_III	1080	CHR_III	1078		AN3730	NCU08909		1.13032	1.31351	1.8885	0.888943	0.982352	2.09538
2	102454	Putative protein of unknown function	CHR_III	587	CHR_III	589					0.886806	0.345383	1.23192	1.40748	1.4642	2.05064
3	102499	Putative Zn(2)Cys6 transcription factor YPR1	CHR_III	540	CHR_III	542		AN7896	NCU04866	TF	2.13318	2.06166	3.20192	1.43609	1.67071	3.98062
1	102775	Putative protein of unknown function	CHR_III	274	CHR_III	276					-1.70168	-1.89688	-3.67872	-0.846282	-0.492416	-2.20936
1	102820	Putative multicopper oxidase (laccase) FET3	CHR_III	229	CHR_III	231	YMR058W		NCU03498		-0.776316	-0.796859	-2.1857	-1.60233	-0.834162	-3.71496
3	102904	Putative protein of unknown function	CHR_III	145	CHR_III	147					3.4517	4.0808	4.50403	2.92124	3.02989	3.49651
1	102908	Putative protein of unknown function	CHR_III	141	CHR_III	143			NCU01063		-1.07965	-1.61333	-2.19605	-1.45608	-1.35831	-2.72306
2	102933	Putative protein of unknown function	CHR_III	116	CHR_III	118					1.01115	1.21139	2.14745	0.810351	1.003	3.03688
1	102960	Putative protein of unknown function	CHR_III	89	CHR_III	91					-0.403661	-0.204735	-1.06523	-0.608184	-0.0644293	-2.03275
4	102966	Putative DUF1349 family protein	CHR_III	83	CHR_III	85					1.62397	2.00752	1.62795	0.976748	1.32285	0.834501
1	102999	Putative protein of unknown function	CHR_III	50	CHR_III	52			NCU04417		-0.473318	-0.623289	-1.70498	-1.75379	-1.80177	-3.12449
3	103012	Putative Oxidoreductase	CHR_III	37	CHR_III	39		AN4108			1.91361	2.9893	4.29629	1.3801	2.14416	3.98307
1	103015	Putative NADH-flavin oxidoreductase/NADH oxidase	CHR_III	34	CHR_III	36		AN5228			-0.942534	-2.15859	-2.09541	-2.18037	-1.69953	-0.261349
1	103033	Putative Polysaccharide lyase family 7	CHR_III	15	CHR_III	17					-0.807051	-1.27108	-2.68961	-0.51899	-0.452735	-2.16094
2	103039	Putative protein of unknown function	CHR_III	8	CHR_III	10					1.44023	1.99862	2.59365	0.700481	1.2037	2.35727
2	103041	Putative NADH-quinone oxidoreductase	CHR_III	6	CHR_III	8					1.81106	2.51188	3.43609	1.1248	1.78323	3.17134
2	103048	Putative protein of unknown function	CHR_I	407	CHR_I	400					1.53329	1.86718	2.98958	1.71302	2.05264	2.79602
3	103049	Putative Glycoside hydrolase family 28	CHR_I	406	CHR_I	399	YJR153W	AN8327	NCU02369		2.48041	4.17019	6.05305	1.71265	3.19331	5.19935
5	103061	Putative protein of unknown function	CHR_I	393	CHR_I	386					-5.48461	-5.54819	-4.80811	-5.07532	-5.58371	-5.12094
5	103062	Putative Alpha/beta-hydrolase	CHR_I	392	CHR_I	385					-3.74409	-5.0522	-4.42681	-4.56183	-4.57902	-4.52842
2	103065	Putative HET domain protein	CHR_I	389	CHR_I	382		AN5504	NCU07115		1.33026	2.14108	2.08021	0.481554	0.957331	1.72684
2	103073	Putative protein of unknown function	CHR_I	381	CHR_I	374					1.21239	1.76982	1.76639	1.42886	1.94585	2.56794
5	103112	Putative protein of unknown function	CHR_I	343	CHR_I	336					-1.33203	-2.02184	-2.82546	-2.12141	-3.00826	-3.84083
2	103136	Putative protein of unknown function	CHR_I	319	CHR_I	312		AN7055			0.716849	0.997412	1.76542	0.799996	1.28987	2.9229
5	103179	Putative protein of unknown function	CHR_I	277	CHR_I	270					-2.8075	-3.94879	-6.04118	-4.09556	-4.27956	-6.69003
1	103189	Putative protein of unknown function	CHR_I	265	CHR_I	258					-1.1871	-2.12473	-1.63874	-1.35218	-2.15263	-2.11428
1	103275	Putative Transcription factor AZF1	CHR_IV	508	CHR_IV	519	YOR113W	AN6503	NCU04179	TF	-0.973228	-1.2111	-1.8504	-1.22084	-1.35492	-2.33578
3	103395	Putative ATPase	CHR_IV	393	CHR_IV	404		AN7091	NCU09856		1.3055	2.57775	3.72959	1.83369	1.4582	3.80381
5	103458	Putative Glycoside hydrolase family 25	CHR_IV & CHR_V	109 & 409	CHR_IV & CHR_V	114 & 409		AN8969	NCU00701		-2.19273	-3.38741	-4.39168	-2.74737	-4.01698	-3.84542
2	103671	Putative protein of unknown function	CHR_V	585	CHR_V	894					0.323567	0.132136	1.46222	0.245474	-0.0396265	2.10883
1	103695	Putative protein of unknown function	CHR_V	606	CHR_V	915					-1.63414	-2.3745	-2.62263	-0.51715	-0.982962	-2.19789
1	103774	Putative protein of unknown function	CHR_V	679	CHR_V	988					-0.331311	-0.437654	-1.14546	0.323021	-0.152683	-1.8123
3	103900	Putative Phosphotransferase	CHR_V	783	CHR_V	1092					2.17963	3.54142	4.52749	2.02259	2.90176	4.56431
2	104050	Putative protein of unknown function	CHR_II	5	CHR_II	5					1.1179	2.66737	3.51433	0.932044	1.74161	2.06564
3	104059	Putative protein of unknown function	CHR_II	14	CHR_II	14		AN8324			2.31525	2.76356	3.65262	1.87852	2.52804	2.95287
1	104061	Putative Transcription factor	CHR_II	16	CHR_II	16				TF	-1.06564	-1.32984	-1.59248	-0.722357	-0.531834	-2.36185
3	104071	Putative protein of unknown function	CHR_II	26	CHR_II	26					1.73795	2.14214	3.55344	1.00721	2.50386	4.01441
3	104072	Xylose permease XLT1 / lat-1	CHR_II	27	CHR_II	27	YFL040W	AN9173	NCU02188		1.48622	2.50538	3.91177	1.49887	2.84305	4.02071
2	104073	Putative protein of unknown function	CHR_II	28	CHR_II	28					1.51239	2.18816	2.99672	1.10378	1.58539	2.9348
2	104077	Putative protein of unknown function	CHR_II	32	CHR_II	32					0.794489	1.06246	1.9017	0.98182	1.4863	2.35018
2	104081	Putative protein of unknown function	CHR_II	36	CHR_II	36					-2.05587	1.26732	2.87802	-0.771805	1.2722	3.92777
1	104168	Putative protein of unknown function	CHR_II	122	CHR_II	122		AN3165			-1.26975	-1.22902	-1.63219	-1.67097	-1.69736	-3.73109
1	104211	Putative Membrane-bound peptidyl-prolyl cis-trans isomerase FPR2	CHR_II	164	CHR_II	164	YDR519W	AN3598	NCU02455		-0.896243	-0.0831317	-0.626398	-1.56035	-1.96959	-2.51018
2	104222	Putative GCN5-related acetyltransferase	CHR_II	176	CHR_II	176		AN8373			0.809082	0.69185	2.02199	0.481693	0.781327	2.07816
3	104227	Putative protein of unknown function	CHR_II	182	CHR_II	182					3.76739	4.52847	6.14441	2.74349	3.9559	5.71402
2	104293	Putative Hydrophobin	CHR_II	245	CHR_II	245					-0.0354857	0.58701	1.15698	3.77912	3.25843	4.90417
3	104295	Putative protein of unknown function	CHR_II	247	CHR_II	247		AN9089	NCU09459		2.83902	3.742	4.67448	1.94569	2.66239	3.86922
4	104393	Putative S-adenosylmethionine-dependent methyltransferase	CHR_II	343	CHR_II	343		AN3975			2.02785	2.22366	1.02676	1.61951	2.15047	-0.473468
4	104394	Putative lipase/esterase	CHR_II	344	CHR_II	344					3.14576	4.15982	1.09261	2.35424	3.23226	-1.47906
3	104422	Putative protein of unknown function	CHR_II	370	CHR_II	370					3.01476	3.68074	5.10878	2.16783	2.46557	3.79614
3	104423	Putative protein of unknown function	CHR_II	371	CHR_II	371					2.13301	3.77844	3.67925	1.82571	2.66698	2.64954
1	104461	Putative alpha/beta-hydrolase	CHR_II	409	CHR_II	409			NCU02904		0.77448	0.833434	-0.223531	0.603398	0.979105	-1.70234
1	104549	Putative MFS transporter	CHR_II	497	CHR_II	497			NCU02512		-0.868237	-0.733212	-1.47757	-1.32751	-1.06492	-2.01509
5	104584	Putative protein of unknown function	CHR_II	530	CHR_II	530		AN4702	NCU00881		-1.61793	-2.65085	-3.35101	-2.36948	-3.26042	-3.87274
2	105167	Putative protein of unknown function	CHR_VII	1321	CHR_V	561					1.1845	1.80135	2.92037	0.573251	1.19035	2.50684
2	105216	Putative Ankyrin repeat protein	CHR_VII	1821	CHR_I	1311					1.69455	1.93408	2.47928	1.27109	1.57421	2.24123
4	105220	Putative DUF3328 protein	CHR_VII	1819	CHR_I	1309					2.16704	2.27492	2.23141	1.44776	1.55834	1.54166
4	105221	Putative protein of unknown function	CHR_VII	1818	CHR_I	1308					2.98944	3.07865	2.68774	1.50619	1.44344	1.17319
4	105222	Putative protein of unknown function	CHR_VII	1817	CHR_I	1307					3.85431	3.65853	2.09685	2.04255	2.00956	-0.604526
2	105233	Putative protein of unknown function	CHR_VII	1807	CHR_I	1297					0.289178	0.731726	2.67142	-0.451194	1.49247	2.97871
1	105275	Putative pectin lyase	CHR_VII	1773	CHR_I	1263			NCU09424		-0.744195	-1.38954	-2.31158	-0.864918	-1.21307	-2.68084
1	105311	Putative protein of unknown function	CHR_VII	1741	CHR_I	1231					-1.52039	-2.48793	-2.13649	-1.22714	-1.75193	-3.19711
1	105346	Putative protein of unknown function	CHR_VII	1712	CHR_I	1202					-0.529816	-1.39771	-1.32613	-1.26386	-1.02517	-2.54787
4	105444	Putative protein of unknown function	CHR_VII	1624	CHR_I	1114			NCU07485		1.76107	2.30347	2.07956	1.3811	2.00871	1.4005
4	105445	Putative protein of unknown function	CHR_VII	1623	CHR_I	1113			NCU06412		0.774578	1.12913	0.368603	0.761373	1.42853	-1.61914
4	105449	Putative Protein kinase-like domain protein	CHR_VII	1619	CHR_I	1109					1.82054	2.09803	2.27822	0.170539	0.926444	0.0826545
1	105465	Putative protein of unknown function	CHR_VII	1602	CHR_I	1092					-1.07146	-0.94476	-1.90103	-1.2668	-0.356853	-2.53643
1	105515	Putative protein of unknown function	CHR_VII	1559	CHR_I	1049					-1.32946	-1.65654	-2.25342	-1.88603	-1.88772	-3.01553
1	105520	Putative Zn(2)Cys6 transcription factor	CHR_VII	1554	CHR_I	1044		AN11868	NCU09829	TF	-0.606003	-1.48066	-2.04184	-0.856414	-0.838737	-1.00338
5	105533	Putative protein of unknown function	CHR_VII	1544	CHR_I	1034			NCU00607		-2.1817	-3.49548	-3.24797	-2.19062	-3.31949	-2.61048
4	105553	Putative protein of unknown function	CHR_VII	1526	CHR_I	1016					1.80506	2.66636	1.86387	1.41751	0.805088	0.519175
2	105729	Putative Alpha/beta-hydrolase	CHR_IV	373	CHR_IV	379					-0.129982	0.695335	2.61447	-0.0905204	1.3614	3.99941
4	105798	Putative MFS transporter	CHR_V	16	CHR_V	16		AN3383	NCU00857		5.20675	4.221	-2.6393	4.057	2.86861	-2.67098
4	105805	Putative Zn(2)Cys6 transcription factor	CHR_V	21	CHR_V	21				TF	5.53042	5.3353	0.00063685	3.33746	2.75591	-0.841005
4	105806	Putative Toxin biosynthesis protein	CHR_V	22	CHR_V	22		AN9220			6.52113	5.20893	2.0018	4.663	3.51305	1.92701
2	105848	Putative Acyl-CoA N-acyltransferase	CHR_V	59	CHR_V	59					1.39264	1.86956	3.36493	1.24803	1.31845	3.62302
2	105874	Putative protein of unknown function	CHR_V	82	CHR_V	82					0.603388	1.13817	1.48812	0.420808	0.854345	2.17127
1	106024	Putative Adhesin	CHR_V	218	CHR_V	218					-0.987256	-0.795906	-1.43973	-0.9064	-1.08381	-2.52521
2	106043	Putative protein of unknown function	CHR_V	235	CHR_V	235					1.68896	2.06621	2.96995	0.971847	1.13766	2.37765
1	106120	Putative Sterol deacetylase	CHR_V	302	CHR_V	302	YGR263C	AN0666	NCU06152		-0.664086	-0.903586	-1.40621	-1.51571	-1.4735	-2.59869
1	106160	Putative Protein kinase domain protein	CHR_V	339	CHR_V	339					0.373757	0.740698	0.0211964	0.375852	0.810371	-1.2641
4	106164	Putative NAD(P)-binding Rossmann-fold domain protein	CHR_V	343	CHR_V	343					2.48744	2.82665	2.77719	1.71672	2.25211	1.68
2	106171	Putative HET domain protein (sp Sordariomycetes)	CHR_V	350	CHR_V	350			NCU04748		1.1259	2.02288	3.29272	0.966026	1.05689	3.5604
2	106236	Putative protein of unknown function	CHR_VII	403	CHR_VII	403					1.3628	1.04622	2.62381	1.16912	0.793862	2.39638
1	106259	Putative Cutinase transcription factor CTF1	CHR_VII	381	CHR_VII	381				TF	-1.37922	-1.96954	-2.23962	-1.39103	-1.75553	-2.95511
5	106270	Putative protein of unknown function	CHR_VII	371	CHR_VII	371		AN12394	NCU01292		-1.79279	-4.57313	-7.02148	-3.44303	-6.35709	-6.45789
2	106315	Putative Trypsin-like serine proteases domain protein	CHR_VII	332	CHR_VII	332					0.596053	1.04237	2.16813	-0.275046	0.255755	1.79505
2	106491	Putative protein of unknown function	CHR_VII	190	CHR_VII	190					1.59043	2.34218	2.88523	1.36435	1.86403	3.16669
3	106556	Putative MFS low-affinity glucose transporter HXT17 / HXT13	CHR_VII	137	CHR_VII	137	YNR072W	AN5860	NCU01633		3.19673	3.99783	4.37721	2.41428	1.97624	4.21998
1	106654	Putative protein of unknown function	CHR_VII	56	CHR_VII	56		AN8298	NCU03110		-1.46953	-2.31468	-2.40089	-1.11303	-1.65542	-2.25103
1	106660	Putative protein of unknown function	CHR_VII	50	CHR_VII	50					-1.33001	-1.78802	-2.2996	-1.7426	-2.13118	-2.0307
5	106661	Putative Scytalidopepsin B	CHR_VII	49	CHR_VII	49		AN3377			-2.36198	-0.906681	-4.04023	-1.66931	-3.47685	-3.92299
3	106686	Putative Taurine catabolism dioxygenase TauD	CHR_VII	27	CHR_VII	27		AN6453	NCU06964		2.09042	2.79036	4.19915	1.8854	2.46729	4.10208
2	106706	Putative protein of unknown function	CHR_VII	13	CHR_VII	13					0.995037	1.57624	1.86096	1.11083	1.73861	2.06711
4	106936	Putative Ferric reductase transmembrane component	CHR_VI	754	CHR_VI	754		AN6400			2.47364	4.97925	3.6618	0.85282	2.31619	2.17719
2	107014	Putative protein of unknown function	CHR_VI	827	CHR_VI	827			NCU04083		0.73561	1.37395	2.42041	0.646842	1.17162	2.50508
1	107112	Putative protein of unknown function	CHR_VI	909	CHR_VI	909					-0.766614	-1.88209	-2.02418	-0.525667	-1.20549	-2.35321
2	107142	Putative Metalloprotease	CHR_VI	932	CHR_VI	932		AN3393	NCU05071		1.30426	2.59949	3.53431	-0.171671	1.37244	3.0686
1	107151	Putative protein of unknown function	CHR_VI	940	CHR_VI	940		AN5988	NCU05575		-0.518674	-0.440926	-1.46733	-0.814108	-0.542133	-2.00942
1	107202	Putative protein of unknown function	CHR_I	826	CHR_I	825			NCU01607		-0.265652	-0.576328	-1.47519	-0.490192	-0.918382	-2.91573
2	107347	Putative protein of unknown function	CHR_I	703	CHR_I	702					2.10792	0.279054	3.59557	1.66739	1.50621	3.01631
5	107386	Putative protein of unknown function	CHR_I	671	CHR_I	670			NCU01620		-1.06391	-2.97933	-3.83432	-1.84306	-1.92867	-5.37972
1	107644	Putative 5'-nucleotidase	CHR_VI	539	CHR_VI	539		AN9142	NCU12022		-1.25682	-1.09516	-2.35308	-1.42325	-2.77011	-2.63963
4	107667	Putative Geranylgeranyl pyrophosphate synthase	CHR_VI	522	CHR_VI	522		AN11984			1.58987	1.64127	1.16968	0.999814	2.06541	1.78577
1	107704	Putative protein of unknown function	CHR_VI	495	CHR_VI	495					-1.9	-1.48805	-3.4896	-1.61273	-1.21286	-2.38636
2	107715	Putative protein of unknown function	CHR_VI	486	CHR_VI	486					0.532035	1.1941	2.18115	0.387148	0.610309	2.86168
2	107866	Putative protein of unknown function	CHR_VI	358	CHR_VI	358					1.7146	2.34613	2.82583	1.62132	2.04607	2.98942
2	107881	Putative protein of unknown function	CHR_VI	345	CHR_VI	345					-0.939864	-0.891293	0.280362	-1.65686	-1.27349	0.440239
2	108024	Putative protein of unknown function	CHR_VI	222	CHR_VI	222					-0.450327	0.51501	0.450967	1.14884	2.79828	2.72692
1	108145	Putative protein of unknown function	CHR_V	1030	CHR_V	1339					0.683911	-0.88057	-1.81783	-0.166962	-0.758895	-1.93727
1	108284	Putative protein of unknown function	CHR_V	1145	CHR_V	1454		AN4312	NCU06737		0.166334	0.363078	-1.35571	-0.15652	0.256508	-2.06204
3	108340	Putative protein of unknown function	CHR_V	1193	CHR_V	1502					2.70032	3.75415	4.51776	1.50231	2.3237	3.28776
2	108540	Putative M peptidase	CHR_VII	552	CHR_VII	552					1.34662	2.00227	2.56501	2.61662	2.95082	2.94536
2	108577	Putative PLC-like phosphodiesterase	CHR_VII	513	CHR_VII	513					1.39295	1.10383	1.82018	1.64874	1.14443	2.74818
1	108586	Putative S-adenosyl-L-methionine-dependent methyltransferase binding domain protein	CHR_VII	504	CHR_VII	504					-1.40896	-1.68963	-2.2664	-2.14688	-2.55632	-3.20393
4	108663	Putative protein of unknown function	CHR_IV	118	CHR_IV	124					2.60438	2.68508	2.68408	1.54697	2.04848	2.08472
2	108676	Putative protein of unknown function	CHR_IV	130	CHR_IV	136			NCU05191		0.868868	2.16398	2.68024	0.961442	2.12848	2.51604
2	108781	Putative protein of unknown function	CHR_IV	216	CHR_IV	222					0.641871	0.98076	1.9682	-0.0616309	0.634823	3.04992
2	108819	Putative protein of unknown function	CHR_IV	248	CHR_IV	254					0.956947	1.77351	2.75875	-0.335804	1.23346	3.67324
1	108929	Putative protein of unknown function	CHR_VI	1346	CHR_VI	1346					-0.329425	-0.948391	-1.77492	-0.825967	-1.23143	-2.52542
1	108996	Putative protein of unknown function	CHR_VI	1287	CHR_VI	1287					-1.27885	-1.84648	-2.45077	-1.2631	-1.64982	-1.52972
1	109022	Putative protein of unknown function	CHR_VI	1265	CHR_VI	1265	YGL116W	AN0814	NCU02616		-0.234108	-0.374358	-1.04569	-0.695738	-0.234059	-2.24891
3	109075	Putative protein of unknown function	CHR_VI	1224	CHR_VI	1224					1.47736	2.45473	3.68753	1.56632	2.63625	4.04126
4	109147	Putative protein of unknown function	CHR_VI	1161	CHR_VI	1161		AN8437			1.84238	2.18562	2.32124	1.67743	1.7565	1.64971
2	109239	Putative protein of unknown function	CHR_I	58	CHR_I	51					0.333711	0.661919	2.62665	1.31743	1.51268	2.8858
3	109253	Putative protein of unknown function	CHR_I	72	CHR_I	65					1.84041	2.65046	3.65081	1.63999	2.116	3.32794
3	109255	Putative protein of unknown function	CHR_I	74	CHR_I	67					2.04395	3.02401	4.13768	1.26374	2.06141	3.3577
1	109338	Putative protein of unknown function	CHR_I	156	CHR_I	149					-1.28459	-2.02183	-1.64207	-1.10705	-1.34137	-2.15643
2	109367	Putative protein of unknown function	CHR_I	186	CHR_I	179					0.811476	2.4168	2.84964	-0.258895	1.87782	3.11235
1	109372	Putative protein of unknown function	CHR_I	191	CHR_I	184					-1.43726	-2.00174	-2.85639	-2.84159	-2.24471	-3.07381
3	109376	Putative Tyrosine decarboxylase	CHR_I	195	CHR_I	188					1.99065	3.42193	4.45151	2.1079	2.26809	4.61587
3	109378	Putative Carbon nitrogen ligase	CHR_I	197	CHR_I	190					1.82939	2.66188	4.66957	1.15679	1.84453	4.79546
2	109725	Putative protein of unknown function	CHR_IV	914	CHR_IV	924					1.47465	2.46829	2.81041	2.15216	2.69268	3.52093
2	109760	Putative protein of unknown function	CHR_IV	881	CHR_IV	891					0.688227	1.24009	2.19029	0.26903	0.525263	2.45393
2	109806	Putative Metallo-phosphoesterase	CHR_IV	836	CHR_IV	846	YNL217W	AN4713	NCU02150		1.03619	1.73796	2.75959	1.1764	1.5115	3.08607
2	109837	Putative MFS transporter	CHR_IV	807	CHR_IV	817					0.366248	1.27391	2.13687	1.34259	1.35408	3.13928
1	109907	Putative protein of unknown function	CHR_III	959	CHR_III	961					-0.0815669	-0.119391	-1.63188	-0.293952	-0.533457	-2.50557
2	109946	Putative protein of unknown function	CHR_III	929	CHR_III	931					0.569258	0.50321	0.772574	0.422855	0.899631	2.22087
2	109952	Putative protein of unknown function	CHR_III	923	CHR_III	925					0.29543	0.412414	1.6549	-0.491783	0.504933	1.73822
1	110261	Putative protein of unknown function	CHR_IV	1089	CHR_IV	1099					-0.92491	-1.00749	-2.47175	-0.82995	-0.989455	-2.50498
2	110316	Putative protein of unknown function	CHR_IV	1135	CHR_IV	1145		AN10319			-0.079789	-0.0795402	0.904746	-0.0875694	0.498597	2.1523
1	110471	Putative Cu2+/Zn2+ superoxide dismutase	CHR_IV	693	CHR_IV	704					-1.14171	-2.01449	-2.70253	-0.751224	-1.95891	-2.6831
3	110666	Putative Ferric reductase transmembrane component	CHR_VII	749	CHR_VII	749			NCU03868		5.54522	7.20641	8.10511	4.23349	5.16778	6.44178
1	110711	Putative protein of unknown function	CHR_I	851	CHR_I	850					-2.01257	-1.59417	-1.78069	-2.69967	-2.05592	-3.98406
1	110733	Putative protein of unknown function	CHR_I	871							-0.562432	-0.937921	-1.22435	-0.315497	-0.308248	-2.11587
1	110757	Putative Amidohydrolase	CHR_I	891	CHR_VII	6					-0.456252	-0.527816	-1.88481	-0.636723	-0.157363	-3.54127
2	110855	Putative protein of unknown function	CHR_I	977	CHR_VII	32					-2.24708	-0.918165	0.674552	-2.6239	-1.52403	1.68574
5	110862	Putative protein of unknown function	CHR_I	983	CHR_VII	34					-2.86217	-2.74453	-2.99386	-3.92755	-4.00256	-3.68664
3	110894	Putative Glycoside hydrolase family 30	CHR_VI	1466	CHR_VI	1466			NCU09702		2.11471	3.06079	4.46026	1.8332	2.72332	4.16468
2	111048	Putative protein of unknown function	CHR_II	814	CHR_II	814			NCU03016		-0.0999618	1.22149	1.35666	2.0692	2.1922	2.51798
1	111110	Putative Tocopherol O-methyltransferase	CHR_II	864	CHR_II	864			NCU04129		-1.61733	-1.60338	-2.62575	-1.83994	-2.75851	-3.49904
1	111121	Putative Metalloprotease	CHR_II	876	CHR_II	876					-1.71202	-1.11129	-0.826714	-2.10954	-1.46147	-3.63254
2	111239	Putative protein of unknown function	CHR_VI	160	CHR_VI	160					0.953563	1.41343	3.20418	-0.131437	0.164347	3.87261
4	111306	Putative protein of unknown function	CHR_VI	213	CHR_VI	213					2.0039	3.02376	1.33553	1.8287	4.18372	0.484101
1	111345	Putative protein of unknown function	CHR_VI	1044	CHR_VI	1044			NCU02847		-0.127994	-0.303644	-1.18553	-0.287745	-0.389395	-2.20405
1	111357	Putative Sarcosine oxidase	CHR_VI	1055	CHR_VI	1055					-0.967983	-1.50556	-2.51701	-1.45981	-1.50814	-3.31139
1	111362	Putative protein of unknown function	CHR_VI	1059	CHR_VI	1059					-0.117397	-1.30087	-1.92719	0.216508	-0.754517	-1.88494
2	111429	Putative protein of unknown function	CHR_VI	1119	CHR_VI	1119					-0.231643	0.761183	2.25957	0.239623	-0.704437	1.4563
2	111439	Putative protein of unknown function	CHR_VI	1677	CHR_VI	1677					1.60061	1.56053	2.14083	1.75383	1.63423	1.79877
1	111442	Putative protein of unknown function	CHR_VI	1674	CHR_VI	1674			NCU07102		-1.80908	-2.97618	-3.1338	-1.29738	-2.26941	-1.26132
2	111681	Putative protein of unknown function	CHR_III	744	CHR_III	746					0.044138	0.658191	2.24465	0.764334	1.16605	3.58302
2	111758	Putative Mg2+ and Ca2+ tranporter	CHR_II	931	CHR_II	931					1.10328	1.74804	2.93634	0.651357	1.11979	2.87008
2	111762	Putative protein of unknown function	CHR_II	935	CHR_II	935					0.90679	1.14002	2.88884	0.98199	1.46916	3.06238
1	111778	Putative protein of unknown function	CHR_II	950	CHR_II	950					-1.03758	-1.43952	-1.98601	-1.44088	-1.24064	-2.93315
2	111849	Glycoside hydrolase family 30 XYN4	CHR_II	1010	CHR_II	1010					1.91867	2.62855	3.23433	1.40859	2.06173	2.6215
2	111875	Putative protein of unknown function	CHR_III	1066	CHR_III	1064					0.859811	1.29314	3.60819	0.509375	1.23991	4.48257
5	111923	Putative protein of unknown function	CHR_III	1025	CHR_III	1023					-1.08635	-1.37711	-3.18305	-1.24442	-1.27259	-4.86636
2	111932	Putative Aldehyde dehydrogenase	CHR_III	1019	CHR_III	1017					1.82565	2.52106	2.75808	1.34395	2.51567	2.91453
3	111948	Putative protein of unknown function	CHR_III	1008	CHR_III	1006					1.49472	4.35455	4.7885	1.23007	1.99949	3.75029
2	111957	Putative protein of unknown function	CHR_III	1000	CHR_III	998					1.56913	1.88012	2.02899	1.82817	1.91832	2.59412
2	111958	Putative protein of unknown function	CHR_III	999	CHR_III	997					1.13495	1.60712	2.25642	1.8055	2.25341	2.91999
2	112014	Putative protein of unknown function	CHR_VI	25	CHR_VI	25					0.947278	0.759113	2.41492	0.307662	0.668871	3.39058
1	112085	Putative Zn(2)Cys6 transcription factor	CHR_V	1274	CHR_V	1583				TF	-1.54359	-2.008	-1.93117	-1.15942	-1.32886	-2.29216
2	112112	Putative protein of unknown function	CHR_IV	7	CHR_IV	8					1.42801	1.72471	2.00731	0.936662	1.32131	1.65154
1	112125	Putative protein of unknown function	CHR_IV	19	CHR_IV	20					-0.524459	-1.79701	-2.18758	-0.607488	-0.587581	-0.619143
3	112133	Putative protein of unknown function	CHR_IV	26	CHR_IV	27					1.92328	2.74369	4.83356	4.51426	6.01814	9.68549
2	112134	Putative protein of unknown function	CHR_IV	27	CHR_IV	28					1.25673	1.76473	2.68906	0.579941	1.24639	3.43743
3	112140	Putative Glycoside hydrolase family 28	CHR_IV	32	CHR_IV	33		AN9045			2.65341	3.80393	5.17685	1.47664	2.53623	4.3848
3	112387	Putative protein of unknown function	CHR_IV	77	CHR_IV	78					0.919347	2.09106	3.39331	0.95379	1.9328	4.42801
3	112392	Putative Glycoside hydrolase family 11	CHR_IV	81	CHR_IV	82					3.51375	4.26757	5.7882	2.71199	3.03896	3.96671
2	112427	Putative protein of unknown function	CHR_I	490	CHR_I	481					0.491706	1.28705	3.10662	0.47358	2.25543	4.65509
1	112478	Putative protein of unknown function	CHR_VI	84	CHR_VI	84					-1.31419	-2.11994	-2.95387	-0.85368	-2.39484	-2.55847
1	112578	Putative protein of unknown function	CHR_V	1352	CHR_V	1663			NCU08847		-1.077	-1.18795	0.163741	-2.27454	-1.74112	-1.42538
2	119619	Putative protein of unknown function	CHR_III	480	CHR_III	482					1.03238	1.43465	2.08128	0.888365	1.21821	1.93384
5	119857	Putative protein of unknown function	CHR_I	351	CHR_I	344					-1.90065	-2.86756	-4.86609	-2.55541	-3.24371	-5.81428
1	119876	pepsin P7959	CHR_IV	582	CHR_IV	593					0.0216852	0.136808	-0.996927	-0.651713	-0.281664	-2.35442
1	119963	Putative protein of unknown function	CHR_IV	432	CHR_IV	443		AN1338	NCU03873		-0.88423	-0.860004	-1.35573	-1.21122	-0.929972	-2.0547
1	119975	Putative protein of unknown function	CHR_IV	407	CHR_IV	418					-0.603562	-0.491262	-1.68588	-0.76226	-0.420734	-2.24383
1	119989	Hydrophobin Class II HFB2	CHR_V	373	CHR_V	373					-1.13872	-1.66691	-2.12377	-1.86133	-1.93603	-3.53883
2	120030	Putative protein of unknown function	CHR_V	451	CHR_V	451					-0.524336	-0.180167	0.360684	-0.00825791	0.285075	2.52197
1	120031	Putative protein of unknown function	CHR_V	452	CHR_V	452					-1.28619	-1.45748	-1.86892	-1.69143	-1.47458	-2.18078
3	120229	Glycoside hydrolase family 10 XYN3	CHR_V	780	CHR_V	1089		AN1818	NCU05924		2.99749	4.30472	5.11594	1.51994	2.56914	3.74055
3	120312	Glycoside hydrolase family 5 EGL2/CEL5A	CHR_II	13	CHR_II	13			NCU00762		2.40537	3.9104	5.10889	1.34536	2.43246	3.93177
1	120362	Putative protein of unknown function	CHR_II	172	CHR_II	172					-0.321771	-0.183483	-0.52683	-1.12537	-0.590643	-2.06338
3	120504	Putative NAD(P)H-dependent quinone reductase	CHR_II	507	CHR_II	507					2.78993	3.72092	4.79141	1.93356	2.64037	4.16894
2	120609	Putative protein of unknown function	CHR_VII	969	CHR_VII	970					1.38978	1.44746	2.77438	1.78116	0.677307	2.58862
1	120697	Putative protein of unknown function	CHR_VII	1085	CHR_V	714					-0.907265	-1.04924	-1.46947	-1.31662	-1.42798	-2.29206
2	120702	Putative protein of unknown function	CHR_VII	1091	CHR_V	720					-0.219723	0.894555	2.96333	-0.220057	-0.195968	2.96103
2	120749	Glycoside hydrolase family 1 BGL2	CHR_VII	1171	CHR_V	800					1.93431	2.62645	2.87278	1.50477	2.08456	2.39381
1	120823	Putative Serine/threonine-rich cell wall mannoprotein	CHR_VII	1276	CHR_V	606					-1.14407	-1.04761	-2.32239	-1.82202	-1.07543	-3.29275
5	120837	Putative protein of unknown function	CHR_VII	1294	CHR_V	588					-2.05401	-2.13207	-3.46571	-2.94198	-2.29059	-5.11319
4	120926	Putative protein of unknown function	CHR_VII	1665	CHR_I	1155					2.60457	3.79273	3.54701	1.27277	2.37911	2.074
5	120928	Putative RNI-like domain protein	CHR_VII	1662	CHR_I	1152					-0.841493	-2.1803	-3.01934	-1.78911	-3.43901	-4.73788
1	120929	Putative protein of unknown function	CHR_VII	1660	CHR_I	1150					-1.77458	-1.5638	-1.93105	-2.58164	-1.93625	-3.1029
4	120953	Putative Glycoside hydrolase family 18	CHR_VII	1625	CHR_I	1115					1.57699	2.32419	2.07701	0.963349	1.84406	1.52468
4	120961	Glycoside hydrolase family 61 CEL61B	CHR_VII	1599	CHR_I	1089		AN9524	NCU05969		3.36652	4.91701	4.6202	2.5558	2.96971	2.15093
1	121004	Putative protein of unknown function	CHR_VII	1528	CHR_I	1018					-0.732287	-1.18837	-2.1992	-0.754415	-0.680765	-1.64104
1	121022	Putative DNA-directed RNA polymerase II	CHR_VII	1505	CHR_I	995		AN4264	NCU02811		-0.672458	-0.442473	-1.69932	-0.469966	-0.142644	-2.01837
3	121111	Putative ADP-ribosylation protein	CHR_IV	351	CHR_IV	357			NCU05081		2.3491	2.8746	4.24154	1.36426	1.96264	2.75923
2	121121	Putative Transcription factor involved in transporters regulation STB4	CHR_V	4	CHR_V	4				TF	0.908714	1.50625	2.39691	0.711434	1.27885	2.28447
4	121127	Glycoside hydrolase family 3 BXL1	CHR_V	28	CHR_V	28		AN2359	NCU00709		2.58502	3.31919	3.25061	1.56203	2.15427	2.20672
5	121135	Putative protein of unknown function	CHR_V	44	CHR_V	44					-6.87197	-8.37419	-8.86868	-4.61819	-6.21525	-7.30437
1	121251	Putative Cell wall protein	CHR_V	305	CHR_V	305		AN3141	NCU10687		0.685438	0.821479	-1.92128	-0.499092	0.241049	-5.14121
2	121294	Putative Glycoside hydrolase family 16	CHR_VII	418	CHR_VII	418		AN3883			1.57563	1.86375	2.56335	1.49595	1.583	2.63658
1	121306	Putative pepsin	CHR_VII	385	CHR_VII	385			NCU07063		-0.499048	-0.352232	-2.84078	-0.978229	-0.444318	-4.09333
1	121308	Putative protein of unknown function	CHR_VII	380	CHR_VII	380		AN9198	NCU09648		-1.14424	-0.947137	-1.67675	-1.93654	-2.00986	-2.91204
3	121418	Carbohydrate esterase family AES1	CHR_VII	186	CHR_VII	186		AN1792	NCU06364		2.69518	3.41196	4.68978	2.28103	2.58715	3.9697
1	121482	Putative MFS transporter	CHR_VII	45	CHR_VII	45		AN8400			-0.637768	-0.780539	-1.62876	-0.748467	-0.908746	-2.24832
5	121556	Putative Glyoxalase	CHR_VI	637	CHR_VI	637		AN8989			-2.04935	-3.58208	-7.00499	-1.06726	-2.03822	-3.35002
4	121608	Putative MFS transporter	CHR_VI	725	CHR_VI	725		AN3221	NCU05519		0.796191	1.93488	0.815975	1.12078	2.10648	-0.0955397
1	121653	Putative protein of unknown function	CHR_VI	814	CHR_VI	814			NCU09057		-0.448613	-2.91071	-1.63499	-0.187239	-2.88701	-0.79114
2	121661	Aldose 1 epimerase AEP2	CHR_VI	837	CHR_VI	837		AN3432	NCU09705		1.17432	2.07183	2.30476	1.06465	1.58273	2.15964
2	121702	Putative protein of unknown function	CHR_VI	913	CHR_VI	913					0.60818	1.61949	2.37878	0.945429	1.5566	2.71365
1	121735	Glycoside hydrolase family 3 CEL3B	CHR_I	817	CHR_I	816		AN4102	NCU08755		-0.761354	-0.644871	-1.44289	-1.56306	-1.43171	-2.15462
1	121739	Putative protein of unknown function	CHR_I	813	CHR_I	812					-0.898405	-1.35148	-1.88691	-1.10955	-2.18287	-2.94295
1	121818	Putative Non-anchored cell wall protein Ncw-2	CHR_I	669	CHR_I	668			NCU01752		0.372828	0.254123	-2.49637	0.131988	0.358925	-3.55395
2	121870	Putative Protein involved in regulating the endocytosis	CHR_I	607	CHR_I	606	YOR322C	AN0056	NCU09514		0.885364	1.27409	1.72532	0.859829	1.1383	2.11693
5	121883	Putative protein of unknown function	CHR_I	588	CHR_I	587					-2.17482	-1.68668	-3.38995	-3.38729	-1.95969	-3.91799
2	122076	Putative pepsin	CHR_VI	394	CHR_VI	394			NCU02956		-0.029802	0.648146	1.70767	-0.219145	0.130029	2.15937
3	122081	Glycoside hydrolase family 7 EGL1/CEL7B	CHR_VI	383	CHR_VI	383		AN3418	NCU04027		2.45039	3.58718	4.61126	1.55527	2.56104	3.82953
5	122127	Putative Cell wall protein PhiA	CHR_VI	286	CHR_VI	286		AN8333	NCU00399		-1.40298	-2.26591	-3.16254	-2.0389	-2.51345	-4.44912
1	122147	Putative protein of unknown function	CHR_VI	253	CHR_VI	253					-0.412132	-0.64858	-1.14532	-1.38428	-1.06243	-2.29733
2	122208	Zn(2)Cys6 xylanase regulator 1 Xyr1	CHR_V	993	CHR_V	1302		AN7610	NCU06971	TF	1.12734	1.85414	2.24424	0.727105	1.23436	1.95941
1	122242	Putative protein of unknown function	CHR_V	1031	CHR_V	1340					-0.363553	-0.633179	-1.16657	-1.03022	-1.03792	-2.02658
1	122374	Putative protein of unknown function	CHR_VII	675	CHR_VII	675					-1.24189	-1.45503	-2.00612	-1.75774	-1.94247	-2.59935
1	122376	Putative protein of unknown function	CHR_VII	671	CHR_VII	671			NCU03074		-0.896151	-1.05984	-2.02735	-0.760008	-0.867661	-2.25897
1	122422	Putative protein of unknown function	CHR_VII	585	CHR_VII	585			NCU10507		-0.795193	-1.44171	-1.66193	-1.19821	-1.68866	-2.10637
1	122487	Putative protein of unknown function	CHR_VII	447	CHR_VII	447			NCU01173		0.0911357	0.361457	-1.3494	0.535508	0.904506	-1.62282
1	122511	Putative Glycoside hydrolase family 16	CHR_IV	149	CHR_IV	155					-0.638387	-0.761486	-1.49444	-0.459274	-0.225973	-2.05186
1	122523	Putative Zn(2)Cys6 transcription factor	CHR_IV	172	CHR_IV	178			NCU02142	TF	-0.78496	-2.26508	-1.41413	-0.632055	-1.82193	0.144241
1	122579	Putative protein of unknown function	CHR_IV	253	CHR_IV	259			NCU03109		-0.665085	-1.13005	-1.55521	-1.47612	-2.44672	-2.76417
1	122629	Putative protein of unknown function	CHR_VI	1348	CHR_VI	1348					-0.928363	-1.48696	-1.4021	-1.99109	-2.16845	-1.8568
5	122824	Putative GPCR PTH11 type receptor	CHR_I	210	CHR_I	203		AN8971			-3.78681	-4.77386	-5.48054	-2.64427	-3.46632	-5.32646
5	122874	Putative protein of unknown function	CHR_II	639	CHR_II	639			NCU05609		-2.65602	-2.90596	-3.98131	-3.94825	-3.17007	-4.79641
2	122914	Putative DUF3295 family protein	CHR_II	692	CHR_II	692		AN1902	NCU04718		1.23194	2.10061	2.40548	1.0609	1.54958	2.32526
2	122920	ER chaperone BIP1	CHR_II	697	CHR_II	697					0.652328	1.10003	2.04564	0.295045	0.886289	2.08549
1	123009	Putative protein of unknown function	CHR_IV	879	CHR_IV	889					-1.07197	-1.69111	-2.19356	-1.94508	-1.84387	-3.40115
2	123019	Putative Serine/threonine protein kinase	CHR_IV	857	CHR_IV	867					0.665876	1.04002	1.65355	0.636987	0.878058	2.15437
1	123079	Putative cloroperoxidase	CHR_III	961	CHR_III	963					-0.959623	-1.19535	-1.87256	-1.86555	-2.53037	-3.34268
1	123207	Putative Ribosomal protein L29	CHR_IV	1003	CHR_IV	1013			NCU00559		-1.36532	-1.49491	-2.45603	-2.12458	-1.74986	-3.29182
4	123232	Glycoside hydrolase family 12 EGL3/CEL12A	CHR_IV	1034	CHR_IV	1044					1.7251	3.00035	2.64633	0.240319	1.16362	1.25771
2	123261	Putative protein of unknown function	CHR_IV	1106	CHR_IV	1116					0.807116	1.25584	3.20874	0.457249	1.05816	3.4291
3	123283	Glycoside hydrolase family 54 ABF1	CHR_IV	1150	CHR_IV	1160		AN1571	NCU09775		1.86444	3.43642	5.84381	1.85861	3.16447	5.9776
2	123288	Putative Xylulokinase XKI1	CHR_IV	594	CHR_IV	605	YGR194C	AN8790	NCU11353		0.764461	1.18754	2.08892	0.852943	1.242	2.28717
1	123327	Putative SWI-SNF chromatin remodeling complex protein	CHR_IV	658	CHR_IV	669			NCU00322		-0.704173	-0.679199	-1.30196	-1.3393	-1.06566	-2.41811
1	123475	Putative protein of unknown function	CHR_I	904	CHR_VII	863			NCU07454		-0.305348	-1.26994	-2.17622	0.424669	-0.640147	-3.13275
1	123616	Putative protein of unknown function	CHR_II	830	CHR_II	830					-1.14434	-1.24674	-1.42712	-1.28715	-1.38675	-2.19871
4	123649	Putative protein of unknown function	CHR_II	900	CHR_II	900		AN3773	NCU00835		1.39671	1.38135	1.32586	1.86332	2.80635	0.405942
1	123659	Putative Cell wall protein	CHR_VI	92	CHR_VI	92			NCU04033		0.261998	-0.262247	-0.871961	0.996911	0.528224	-1.51007
2	123668	GCN5-related N-acetyltransferase	CHR_VI	110	CHR_VI	110					0.728303	1.02919	1.99818	0.923827	1.23378	2.32981
1	123675	Putative protein of unknown function	CHR_VI	117	CHR_VI	117		AN9473	NCU05958		-1.12415	-1.60964	-2.09158	-1.31192	-1.44989	-1.12828
1	123713	Putative Transcriptional regulator of asexual and sexual reproduction MedA / acon-3	CHR_VI	186	CHR_VI	186		AN6230	NCU07617	TF	-0.882558	-1.14874	-1.70455	-1.4255	-1.36999	-2.15992
2	123779	Putative protein of unknown function	CHR_VI	1078	CHR_VI	1078					0.359855	0.744816	1.70807	0.154413	0.352996	3.12415
1	123786	Putative protein of unknown function	CHR_VI	1091	CHR_VI	1091		AN7884			-0.910621	-0.852905	-1.45629	-1.83605	-1.55853	-2.37225
1	123818	Glycoside hydrolase family 11 XYN2	CHR_VI	1645	CHR_VI	1645		AN9365	NCU07225		-0.0272235	0.319367	-1.50963	-0.228991	-0.281004	-3.3317
4	123914	Putative protein of unknown function	CHR_III	736	CHR_III	738					1.73277	2.15941	1.80057	1.09629	1.77864	1.49057
2	123922	Putative Peptidyl-prolyl cis-trans isomerase	CHR_III	759	CHR_III	761	YDR304C	AN4467	NCU01200		0.573014	1.10862	1.89365	0.432377	1.03339	2.00041
4	123940	Carbohydrate esterase family 15 CIP2	CHR_VI	1693	CHR_VI	1693			NCU09445		2.4162	4.20189	4.07387	0.503616	1.60784	1.23298
1	123967	Putative Hydrophobin	CHR_II	951	CHR_II	951					-1.56093	-1.62764	-2.04517	-1.93035	-1.65796	-3.03194
1	123968	Putative Alpha/beta-hydrolase	CHR_II	960	CHR_II	960		AN5027	NCU05859		-1.22579	-2.03917	-2.57291	-1.86677	-1.93626	-3.45206
5	123976	Putative protein of unknown function	CHR_II	976	CHR_II	976					-2.64066	-3.2565	-4.64294	-3.89208	-3.48486	-5.07364
5	123978	Putative Alcohol oxidase	CHR_II	980	CHR_II	980					-1.73284	-2.0831	-3.28546	-2.22296	-2.2246	-4.2283
3	123979	Putative protein of unknown function	CHR_II	981	CHR_II	981	YLL057C	AN2200			1.25774	2.51029	3.75576	1.36513	2.64809	4.52808
3	123989	Glycoside hydrolase family 7 CBH1/CEL7A	CHR_II	1007	CHR_II	1007		AN0494	NCU07340		2.48301	3.92708	4.94779	1.4546	2.62006	4.2317
3	123992	Endoglucanase Swollenin SWO1	CHR_II	1009	CHR_II	1009					2.55072	3.64567	4.92835	1.61958	2.71959	4.24208
2	124007	Putative protein of unknown function	CHR_III	1031	CHR_III	1029			NCU07527		1.15622	1.61192	2.31571	0.681156	1.22688	2.51704
5	124043	Putative Glycoside hydrolase family 18 CHI18-14	CHR_VI	19	CHR_VI	19		AN8241	NCU02184		-2.76626	-3.47452	-6.93922	-3.03016	-3.99016	-5.7866
5	124051	Putative serine peptidase	CHR_V	1248	CHR_V	1557			NCU09992		0.142198	-0.842136	-4.55097	-0.966028	-1.25824	-5.59772
1	124056	Putative protein of unknown function	CHR_V	1256	CHR_V	1565		AN8786			-0.611513	-1.92647	-2.05985	-0.765783	-1.79806	-1.6952
4	124059	Putative protein of unknown function	CHR_V	1261	CHR_V	1570					1.94197	2.06443	0.628452	1.23303	1.85733	-0.613163
5	124084	Putative protein of unknown function	CHR_IV	41	CHR_IV	42			NCU03847		-2.05463	-2.70577	-3.82859	-1.19032	-2.16613	-3.79436
1	124141	Putative protein of unknown function	CHR_VI	1540	CHR_VI	1540					-1.03209	-1.28418	-2.07143	-1.15882	-1.11009	-2.53542
3	124198	Putative protein of unknown function	CHR_IV	82	CHR_IV	83					3.16728	4.64359	6.46304	2.29773	2.90196	6.24487
1	124283	Putative protein of unknown function	CHR_VII	1375	CHR_V	507					-0.959196	-1.39628	-2.3014	-1.76003	-2.74086	-3.99077

## Sheet: Mutations vs DE genes
ID	Position	Mutation type	Mutation effect	Element	DE genes
1751	scaffold_1:628614	SNV	T > C	promoter
2583	scaffold_3:645601	SNV	C > T	promoter
3027	scaffold_4:1771912	SNV	T > C	exon
3501	scaffold_7:482522	SNV	G > A	promoter
3501	scaffold_7:482522	SNV	G > A	promoter
4726	scaffold_15(1060-86600)	Deletion	del(15:1060-86600)	exon
4921	scaffold_16:817482	SNV	G > T	promoter
5403	scaffold_23:201961	SNV	C > T	intron
6014	scaffold_39:43573	SNV	T > G	promoter
22294	scaffold_9:452495	SNV	T > A	exon
22365	scaffold_9:1203561	SNV	C > T	exon
22841	scaffold_16:357390	SNV	C > T	exon
22994	scaffold_20:147482	SNV	G > A	exon
23001	scaffold_20:220114	SNV	G > A	exon
25224	scaffold_15(1060-86600)	Deletion	del(scaffold_15:1060-86600)	exon
26255	scaffold_3:172993	SNV	G > A	exon
28409	scaffold_43:20860	SNV	A > G	exon
28731	scaffold_18:453399	SNV	G > A	promoter
31118	scaffold_11:317061	SNV	T > C	promoter
31118	scaffold_11:317062	SNV	T > C	promoter
31118	scaffold_11:317063	SNV	A > C	promoter
35768	scaffold_2:1157914	SNV	T > C	exon
36543	scaffold_4:748276-1204826	Inversion	inv(4:748276-1204826)	exon
36543	scaffold_4:1204826	Translocation	t(4;2)(1204826;546698)	exon
40758	scaffold_16:648564	SNV	C > A	promoter
40945	scaffold_4:1814727	SNV	G > T	intron
43418	scaffold_15(1060-86600)	Deletion	del(scaffold_15:1060-86600)	exon
43599	scaffold_1:161998	SNV	G>A	exon
44504	scaffold_1:3248660	SNV	C>T	promoter
45456	scaffold_3:906436	SNV	C>T	intron
49946	scaffold_15(1060-86600)	Deletion	del(scaffold_15:1060-86600)	exon
52368	scaffold_30:222170	SNV	A>G	exon
52520	scaffold_34:5546	SNV	C>A	promoter	oui
53492	scaffold_1:1045635	SNV	C>A	intron
53811	scaffold_1:3525497	SNV	G>A	exon
53870	scaffold_1:1379818	SNV	A>T	terminal
54157	scaffold_1:3628875	SNV	C>T	exon
54511	scaffold_1:2181474	SNV	C>A	promoter
55887	scaffold_2:835149	SNV	C>T	intron
56077	scaffold_2:690339	SNV	G>A	promoter
56726	scaffold_3:1866373	SNV	G>C	promoter
57609	scaffold_4:1729373	SNV	C>T	exon
58073	scaffold_4:63637	SNV	C>G	exon
58161	scaffold_4:1288657	SNV	T>A	terminal
58161	scaffold_4:1288658	SNV	G>T	terminal
58391	scaffold_5:1001779	SNV	G>A	exon
58561	scaffold_5:1670554	SNV	C>T	promoter	oui
58628	scaffold_5:696116	SNV	T>A	exon
58790	scaffold_5:1462623	SNV	C>T	exon
59147	scaffold_6:1419065	SNV	C>T	terminal
59388	scaffold_6:298667	SNV	A>G	exon	oui
59801	scaffold_7:1413954	SNV	G>A	exon
59952	scaffold_7:1395780	SNV	G>A	exon
60243	scaffold_7:772040	SNV	T>C	intron
60458	scaffold_7:1346112	SNV	C>T	exon
60458	scaffold_7:1346454	SNV	C>T	exon
60458	scaffold_7:1348265	SNV	C>T	exon
62380	scaffold_10:1130446	SNV	G>A	promoter
63702	scaffold_12:213823	SNV	C>T	exon
63935	scaffold_13:632142	SNV	C>T	exon
64866	scaffold_14:658748	SNV	C>T	promoter
64882	scaffold_15:721460	SNV	A>G	terminal
64906	scaffold_15(1060-86600)	Deletion	del(scaffold_15:1060-86600)	exon
64956	scaffold_15(1060-86600)	Deletion	del(scaffold_15:1060-86600)	exon
64959	scaffold_15(1060-86600)	Deletion	del(scaffold_15:1060-86600)	exon
64971	scaffold_15(1060-86600)	Deletion	del(scaffold_15:1060-86600)	exon
65036	scaffold_15(1060-86600)	Deletion	del(scaffold_15:1060-86600)	exon
65041	scaffold_15(1060-86600)	Deletion	del(scaffold_15:1060-86600)	exon
65067	scaffold_15(1060-86600)	Deletion	del(scaffold_15:1060-86600)	exon
65097	scaffold_15(1060-86600)	Deletion	del(scaffold_15:1060-86600)	exon
65104	scaffold_15:165438	SNV	T>A	exon
65106	scaffold_15:494858	SNV	C>A	exon	oui
65117	scaffold_15(1060-86600)	Deletion	del(scaffold_15:1060-86600)	exon
65142	scaffold_15(1060-86600)	Deletion	del(scaffold_15:1060-86600)	exon
65172	scaffold_15(1060-86600)	Deletion	del(scaffold_15:1060-86600)	exon
65191	scaffold_15(1060-86600)	Deletion	del(scaffold_15:1060-86600)	exon
65215	scaffold_15(1060-86600)	Deletion	del(scaffold_15:1060-86600)	exon
65773	scaffold_17:787350	SNV	C>A	exon
66895	scaffold_20:37856	SNV	G<T	exon
67024	scaffold_20:307918	SNV	G>A	promoter	oui
67030	scaffold_20:340466	SNV	C>T	promoter
67350	scaffold_21:310987	SNV	A>G	intron
67658	scaffold_22:475328	SNV	T>C	promoter
67732	scaffold_22:344826	SNV	C>T	exon
67806	scaffold_22:52366	SNV	G>A	terminal
68425	scaffold_25:284474	SNV	A>T	promoter
68926	scaffold_27:312897	SNV	G>T	intron
69181	scaffold_28:384711	SNV	C>T	promoter	oui
69437	scaffold_28:29750	SNV	C>T	exon
71037	scaffold_49:24126	SNV	T>C	promoter
71817	scaffold_15(1060-86600)	Deletion	del(scaffold_15:1060-86600)	exon
71823	scaffold_15(1060-86600)	Deletion	del(scaffold_15:1060-86600)	exon
73525	scaffold_1:143292	SNV	G>A	terminal
73912	scaffold_1:1379818	SNV	A>T	terminal
74570	scaffold_2:80111	SNV	C>T	exon
74765	scaffold_2:767703	SNV	C>T	promoter
75072	scaffold_2:1901218	SNV	C>T	promoter
75105	scaffold_2:1967974	SNV	C>T	exon
75879	scaffold_4:748276-1204826	Inversion	inv(4:748276-1204826)	exon
75879	scaffold_4:748276	Translocation	t(4;22)(748276;139515)	downstream
76515	scaffold_5:1246681	SNV	C>T	intron
77336	scaffold_8:17560	SNV	C>A	promoter
78042	scaffold_9:880288	SNV	A>G	terminal
78158	scaffold_10:8461	SNV	G>A	exon
78268	scaffold_10:300196	SNV	G>A	promoter
78301	scaffold_10:391939	SNV	G>A	promoter
78320	scaffold_10:466417	SNV	T>C	promoter
78465	scaffold_10:964271	SNV	G>A	exon
79014	scaffold_12:472221	SNV	G>A	exon
79244	scaffold_13:248935	SNV	T>A	exon
79304	scaffold_13:436645	SNV	G>A	exon
79405	scaffold_13:845372	SNV	A>T	promoter
79725	scaffold_15(1060-86600)	Deletion	del(scaffold_15:1060-86600)	exon
79726	scaffold_15(1060-86600)	Deletion	del(scaffold_15:1060-86600)	exon
80265	scaffold_17:696248	SNV	A>C	exon
80332	scaffold_18:101068	SNV	T>G	promoter
80691	scaffold_20:114297	SNV	G>A	exon
81149	scaffold_23:66573	SNV	G>A	promoter	oui
82153	scaffold_32:40433	SNV	G>A	exon
82499	scaffold_39:38576	SNV	G>A	exon
82606	scaffold_43:62022	SNV	C>T	intron
102776	scaffold_1:1546930	SNV	C>T	promoter
102776	scaffold_1:1546931	SNV	C>T	promoter
103031	scaffold_1:2408137	InDel	-1:G	promoter
103032	scaffold_1:2408137	InDel	-1:G	terminal
103049	scaffold_1:2497406	SNV	A>G	terminal	oui
103061	scaffold_1:2532137	SNV	G>A	exon	oui
103447	scaffold_2:124683	SNV	A>G	terminal
104161	scaffold_3:336690	SNV	A>T	promoter
104599	scaffold_3:1846706	SNV	A>G	terminal
104762	scaffold_4:419150	SNV	T>C	exon
105391	scaffold_5:543850	SNV	C>T	exon
105866	scaffold_6:246104	SNV	A>T	promoter
105874	scaffold_6:285837	SNV	A>T	intron	oui
105874	scaffold_6:285840	SNV	G>A	intron	oui
106009	scaffold_6:740034	SNV	C>T	exon
106981	scaffold_8:760525	SNV	T>A	promoter
107072	scaffold_8:1033975	SNV	A>C	terminal
107078	scaffold_8:1047504	SNV	C>T	exon
107601	scaffold_9:1194759	SNV	G>A	promoter
108133	scaffold_11:317061	SNV	T>C	promoter
108133	scaffold_11:317062	SNV	T>C	promoter
108133	scaffold_11:317063	SNV	A>C	promoter
108591	scaffold_12:766999	SNV	C>T	terminal
108962	scaffold_14:120114	SNV	G>A	exon
109199	scaffold_15(1060-86600)	Deletion	del(scaffold_15:1060-86600)	exon
109201	scaffold_15(1060-86600)	Deletion	del(scaffold_15:1060-86600)	exon
109206	scaffold_15(1060-86600)	Deletion	del(scaffold_15:1060-86600)	exon
109211	scaffold_15(1060-86600)	Deletion	del(scaffold_15:1060-86600)	exon
109219	scaffold_15(1060-86600)	Deletion	del(scaffold_15:1060-86600)	exon
109221	scaffold_15(1060-86600)	Deletion	del(scaffold_15:1060-86600)	exon
109320	scaffold_15:458201	SNV	A>G	promoter
109432	scaffold_16:53679	SNV	A>T	promoter
109432	scaffold_16:53680	SNV	T>G	promoter
109619	scaffold_16:655396	SNV	C>T	exon
110570	scaffold_21:125067	SNV	C>T	exon
110732	scaffold_22:139515	Translocation	t(4;22)(748276;139515)	downstream
110882	scaffold_23:50203	SNV	G>A	exon
111109	scaffold_24:360786	SNV	G>T	promoter
111110	scaffold_24:360786	SNV	G>T	promoter	oui
111236	scaffold_25:199189	SNV	G>A	exon
111861	scaffold_29:379440	SNV	A>G	intron
112215	scaffold_34:150673	SNV	A>G	intron
112231	scaffold_35:33801	SNV	C>T	exon
112346	scaffold_37:74188	SNV	T>C	exon
119768	scaffold_1:1830362	SNV	C>T	exon
119999	scaffold_2:62033	SNV	G>A (GTC:Val>ATC:Ile)	exon
120117	scaffold_2:786555-789431	Deletion	del(2:786555-789431)	exon
121087	scaffold_5:1553311	SNV	G>A	promoter
121351	scaffold_7:430671	InDel	-1:A	exon
121453	scaffold_7:1019614	SNV	T>G	exon
122050	scaffold_10:492107	SNV	C>T	promoter
122212	scaffold_11:230007	SNV	A>G	exon
122689	scaffold_14:346201	SNV	C>A	terminal
122689	scaffold_14:347926	SNV	C>T	exon
122778	scaffold_15(1060-86600)	Deletion	del(scaffold_15:1060-86600)	exon
122780	scaffold_15(1060-86600)	Deletion	del(scaffold_15:1060-86600)	exon
123126	scaffold_18:356116	SNV	G>A	exon
123786	scaffold_26:315805	SNV	G>A	exon	oui
124172	scaffold_37:26185	SNV	A>G	terminal
